# Supplementary material for: Dual-target ligand discovery for Alzheimer’s disease: triphenylphosphoranylidene derivatives as inhibitors of acetylcholinesterase and β-amyloid aggregation
Source: PubMed Central journal article supplement (PMC9879200; doi:10.1080/14756366.2023.2166040), 2023-01-24

## Supporting Information file

---

### Dual-target ligand discovery for Alzheimer's disease: Triphenylphosphoranylidene derivatives as inhibitors of acetylcholinesterase and $\beta$ -Amyloid aggregation

---

**Marwa El-Hussieny<sup>a\*</sup>, Mansoura A. Abd-El-Maksoud<sup>a</sup>, Fouad M. Soliman<sup>a</sup>,  
Marwa A. Fouad<sup>b,c</sup>, Mohamed K. El-Ashrey<sup>b\*</sup>,**

<sup>a</sup> *Organometallic and Organometalloid Chemistry Department, National Research Centre, 33 ElBohouth St., (Former El Tahrir) Dokki, 12622, Giza, Egypt.*

<sup>b</sup> *Pharmaceutical Chemistry Department, Faculty of Pharmacy, Cairo University, Kasr El-Aini St., Cairo, 11562, Egypt.*

<sup>c</sup> *Pharmaceutical Chemistry Department, School of Pharmacy, NewGiza University, Newgiza, km 22 Cairo-Alexandria Desert Road, Cairo, Egypt.*

### ***S1. Experimental***

#### ***S1.1. Chemistry***

Melting points were determined with an electro thermal digital melting point apparatus (Electro-Thermal Engineering Ltd., Essex, United Kingdom). The IR spectra were recorded in KBr disks on a Pye Unicam SP 3300 and Shimadzu FT IR 8101 PC Infrared Spectrophotometers (Pye Unicam Ltd. Cambridge, England and Shimadzu, Tokyo, Japan, respectively). <sup>1</sup>H and <sup>13</sup>C NMR spectra were obtained from a Jeol ECA 500 MHz NMR Spectrometer (Tokyo, Japan) using deuterated dimethylsulphoxide (d<sub>6</sub>-DMSO) as a solvent and (TMS) as an internal reference at 500, 125 MHz, respectively and <sup>31</sup>P NMR spectra were obtained from a Jeol ECA 500 MHz NMR Spectrometer at 200 MHz. Mass spectra (EI-MS) were obtained with ISQ (Single Quadrupole MS, Thermo Scientific). Elemental analyses (C, H, N) results were recorded with Elementar Vario EL Germany, phosphorus was measured by spectrophotometric methods. The recorded yields are of pure isolated materials obtained by column chromatography silica gel 60 (Merck) and thin layer chromatography (TLC) which was performed on Merck Kiesel gel F254 precoated plates (Merck, Darmstadt, Germany).

*S2. Copies of IR, <sup>1</sup>H NMR, <sup>13</sup>C NMR and <sup>31</sup>P NMR spectra of final compounds*

*<sup>1</sup>H NMR, <sup>13</sup>C NMR, <sup>31</sup>P NMR and IR compound 5a*

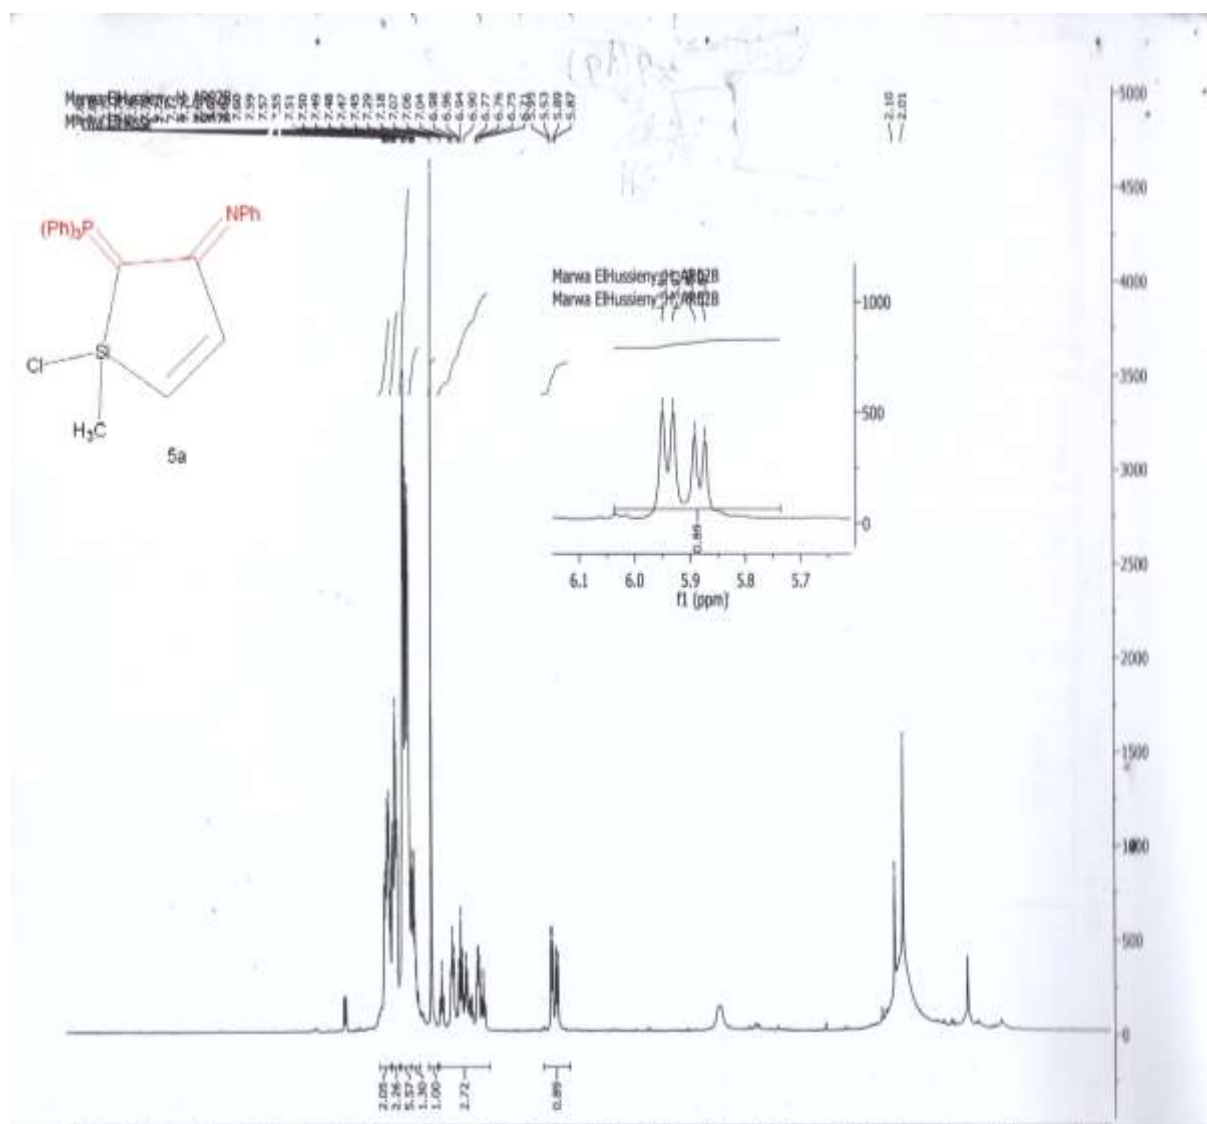



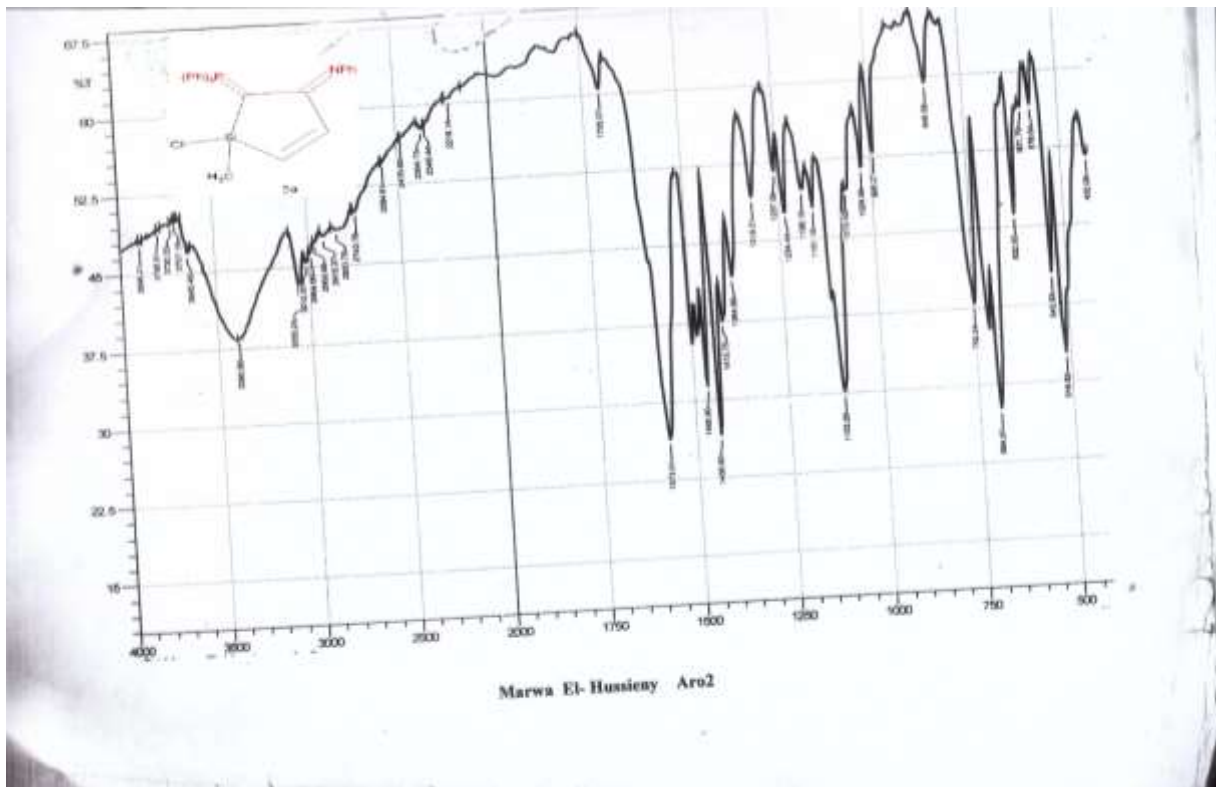

*<sup>1</sup>H*NMR, *<sup>31</sup>P*NMR and IR compound 5b

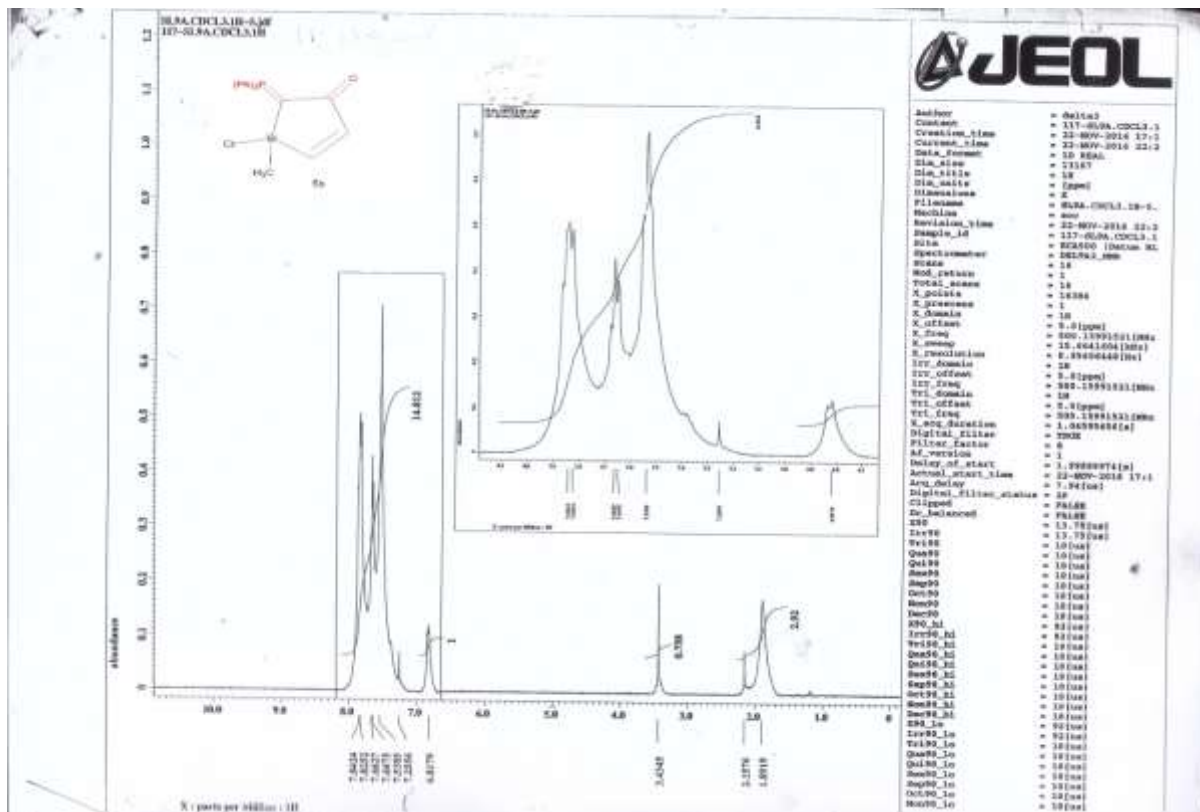



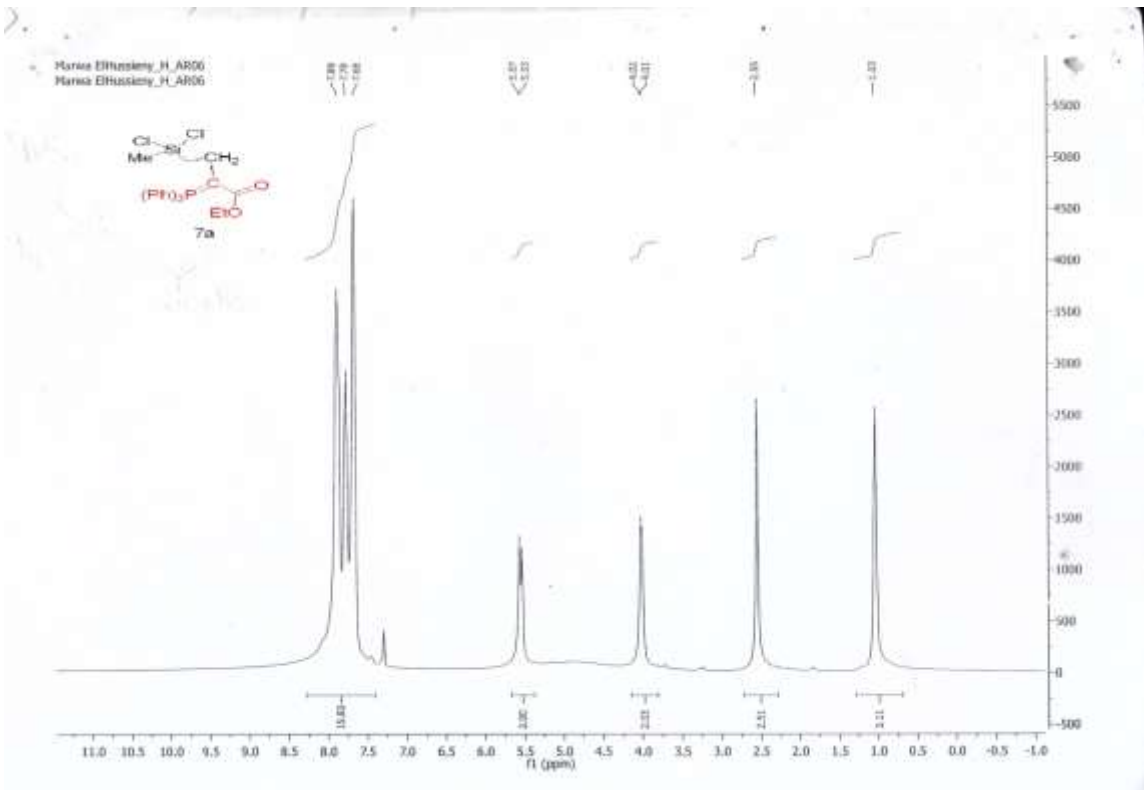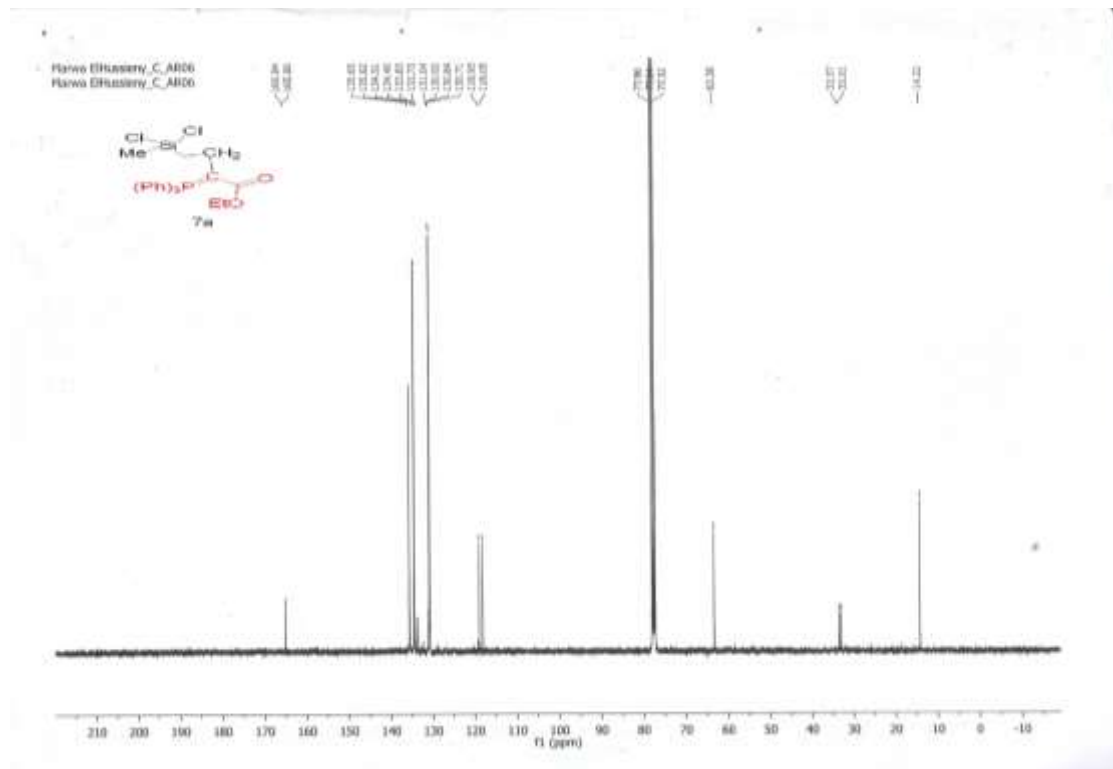

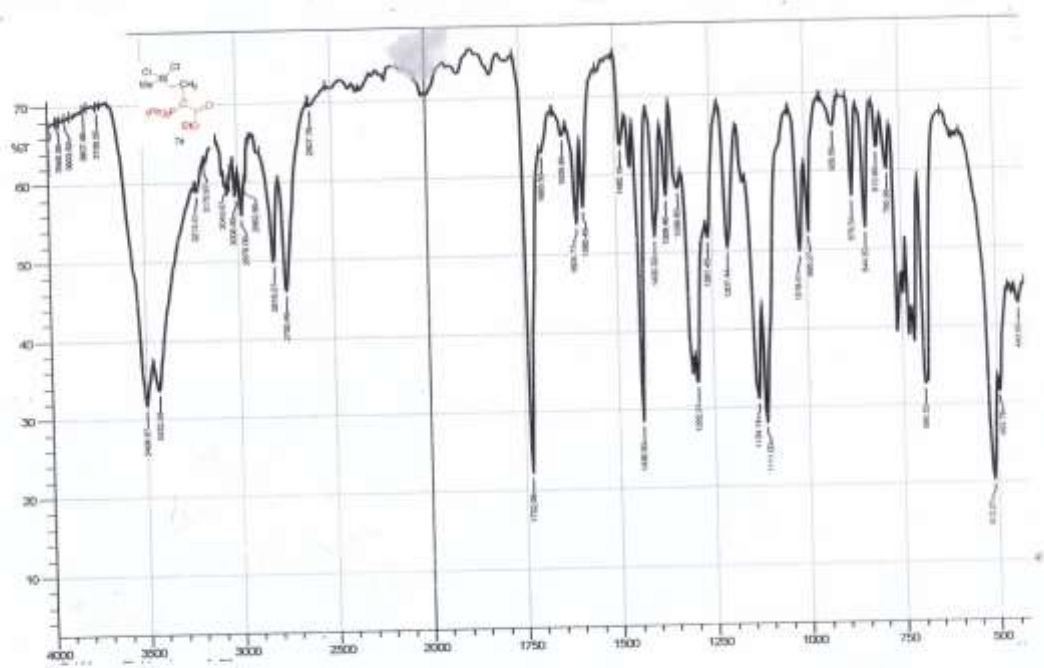

Marwa El-Hussieny ArO6

***<sup>1</sup>H NMR, <sup>13</sup>C NMR, <sup>31</sup>P NMR and IR compound 8b***

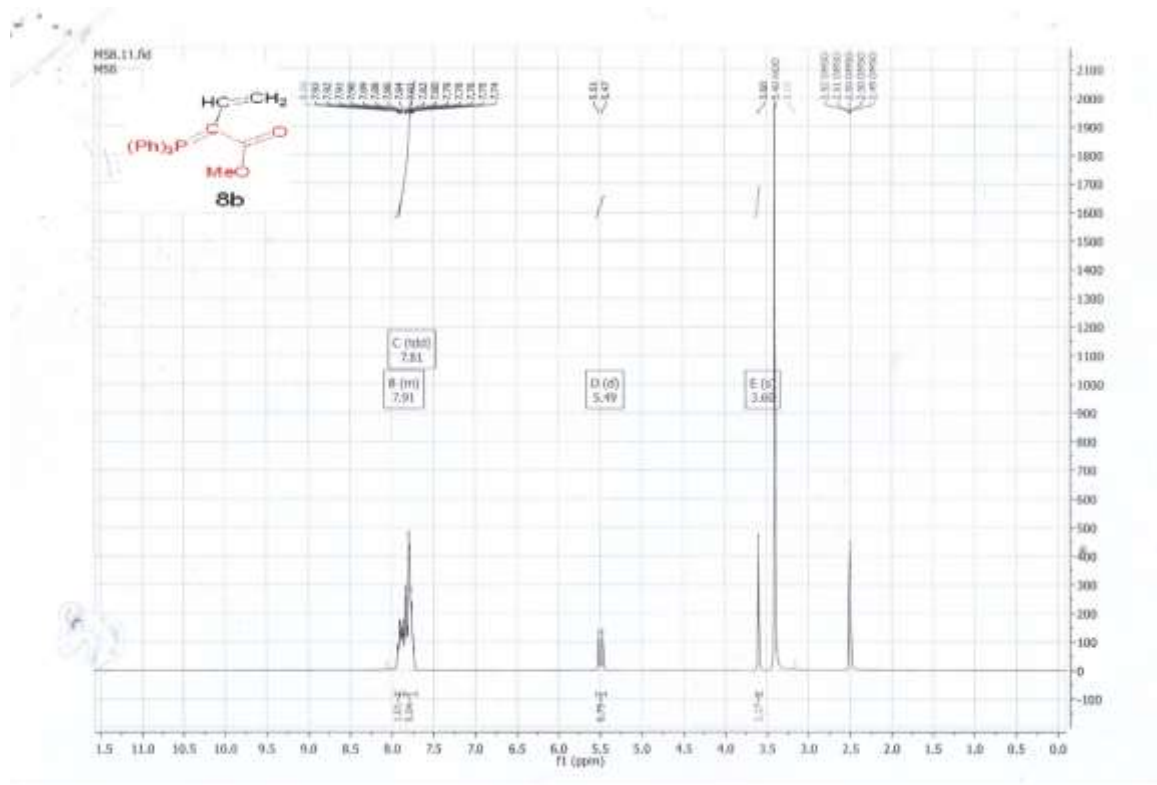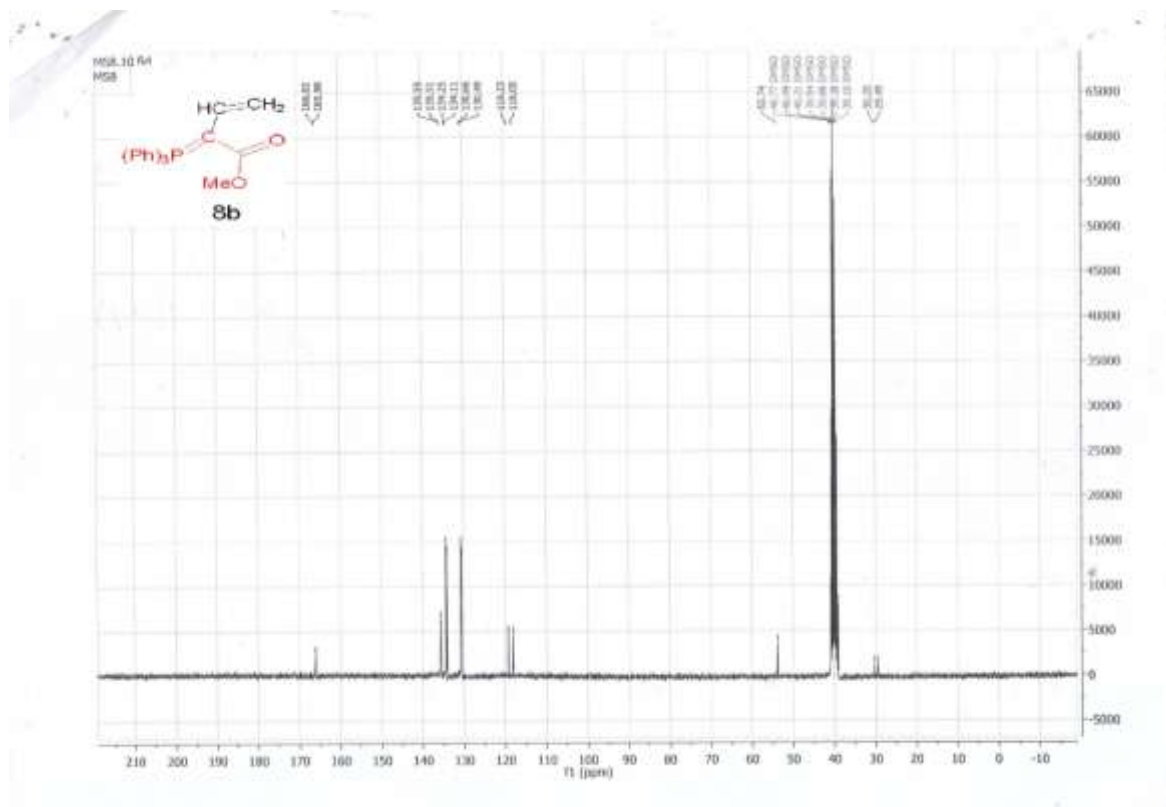





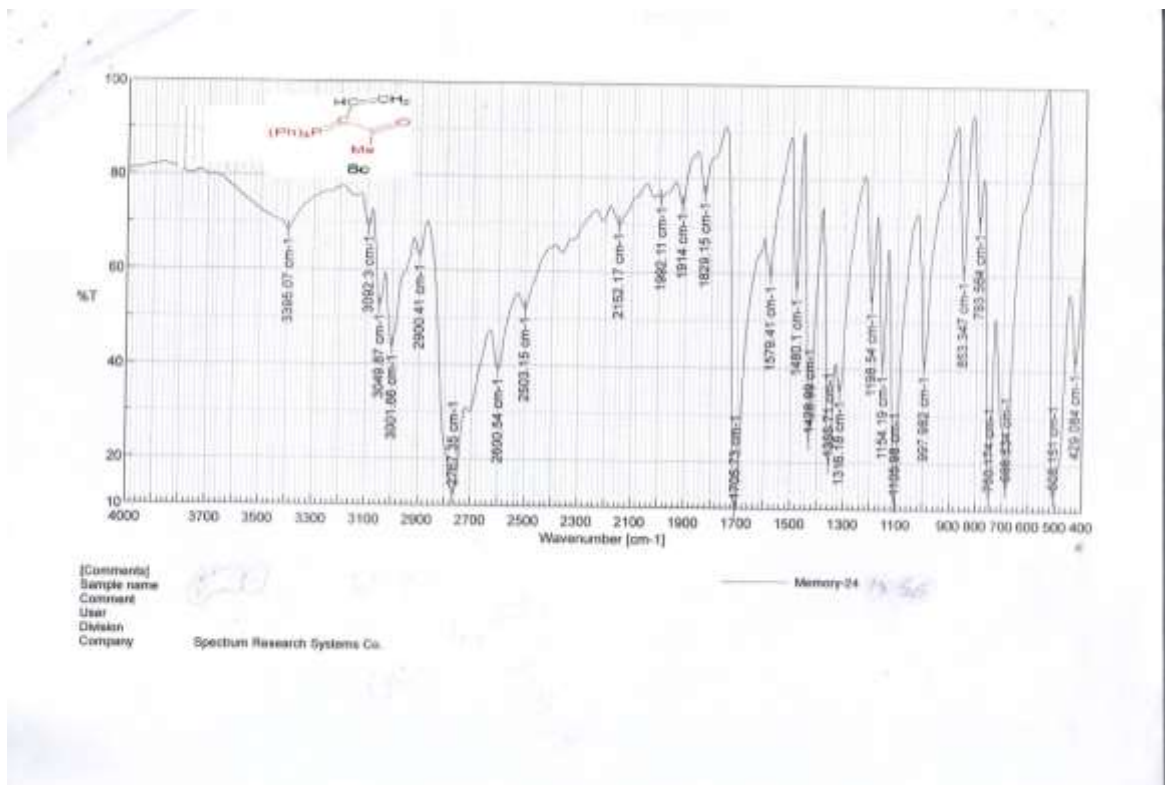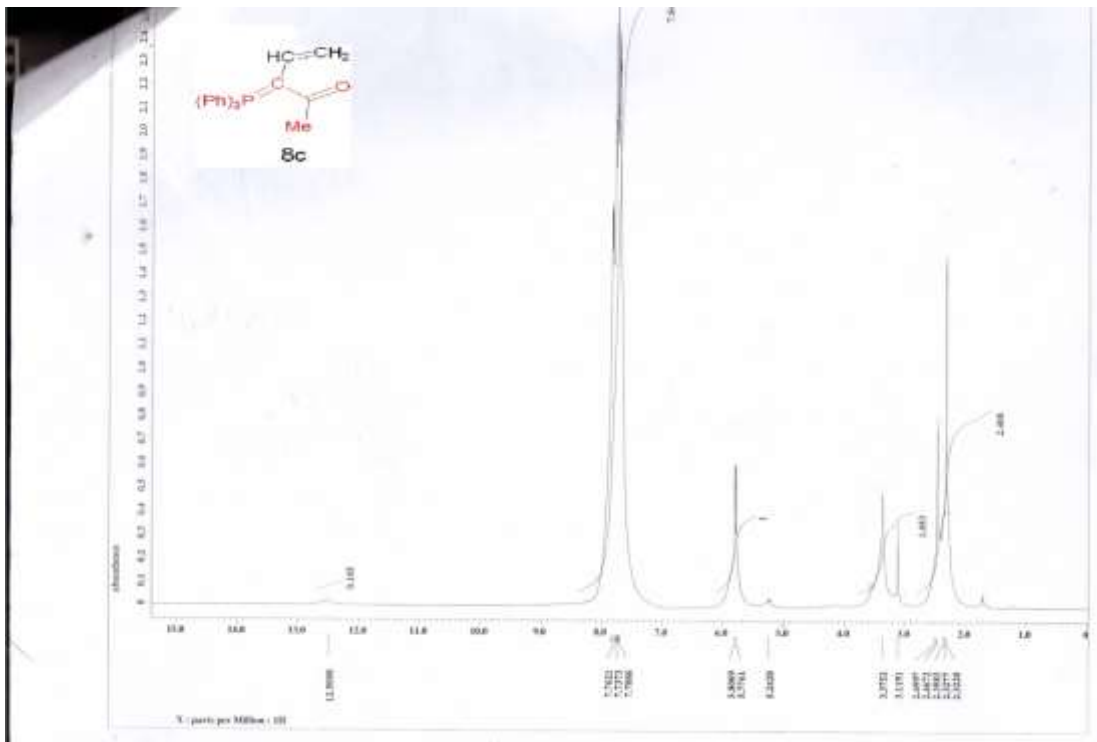

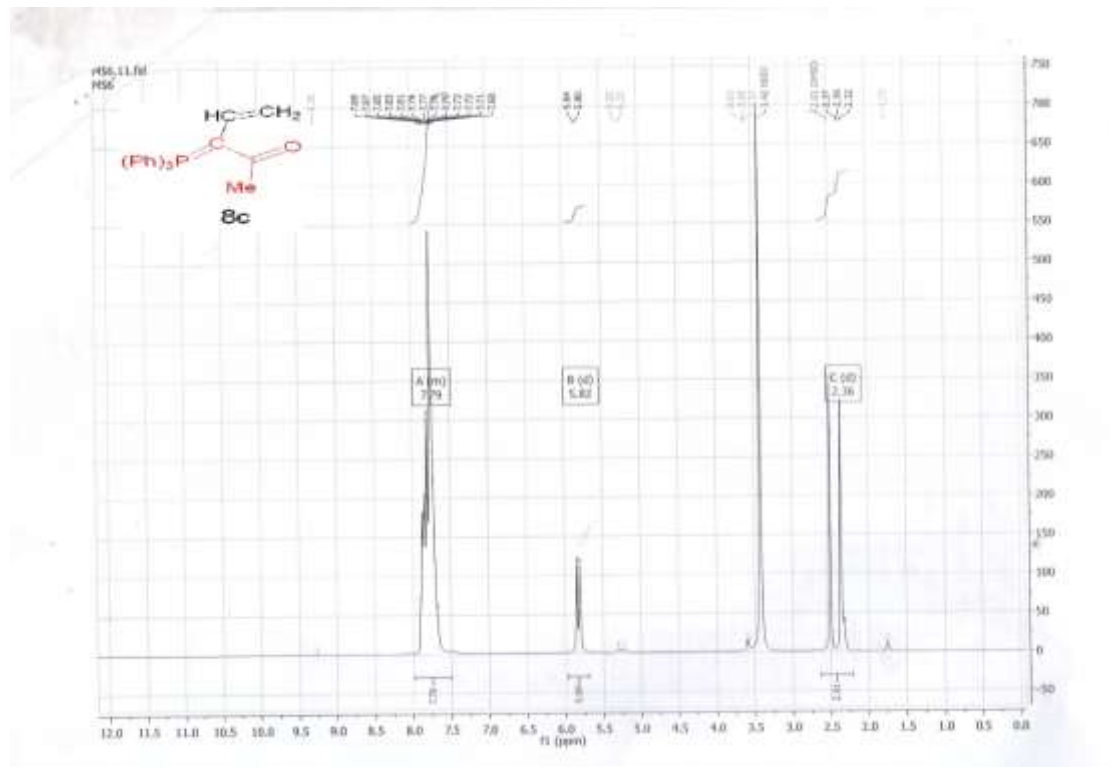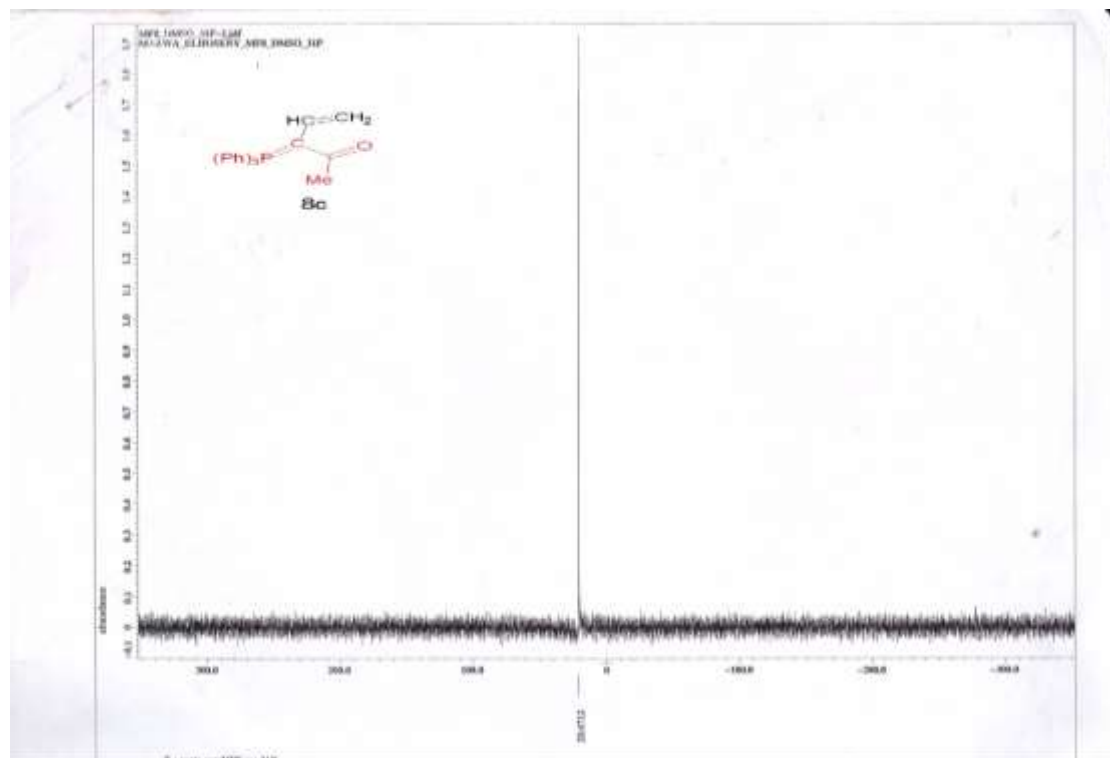



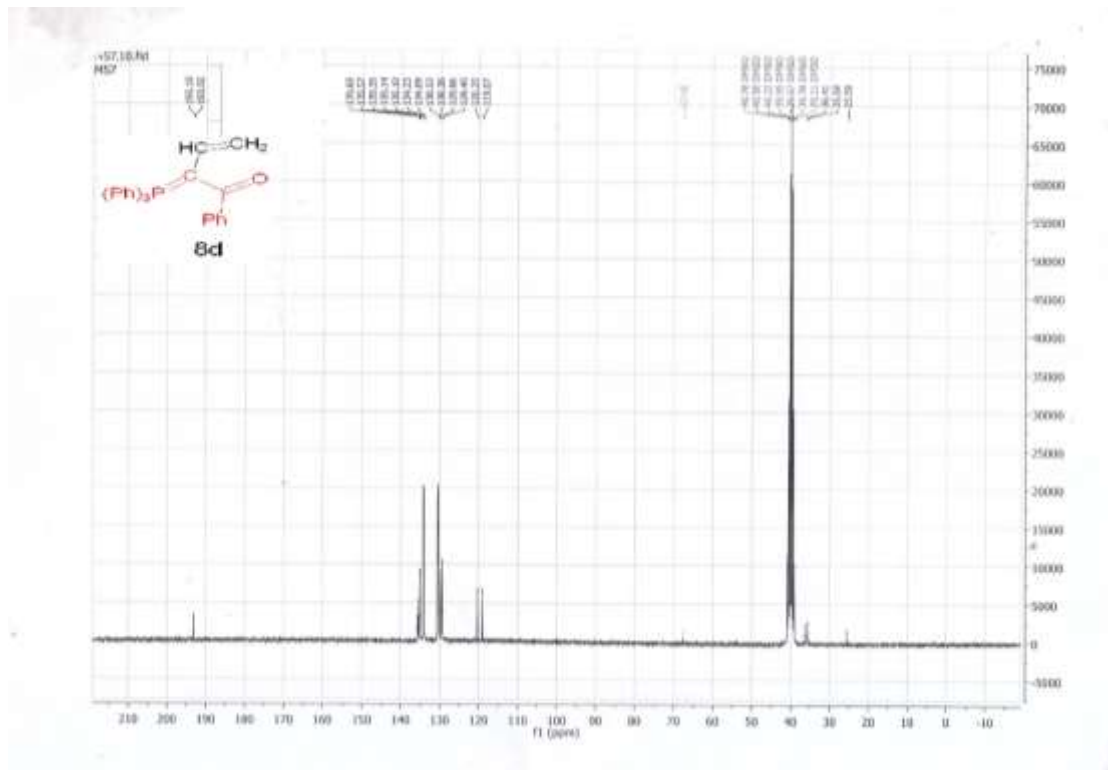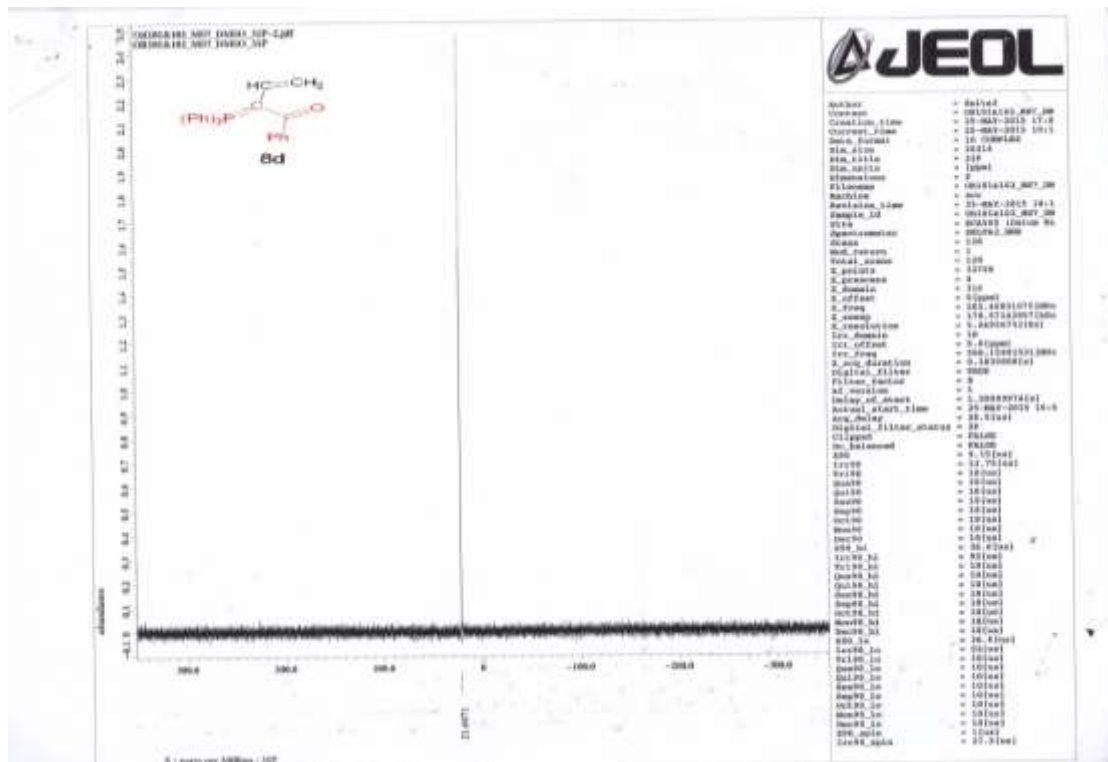

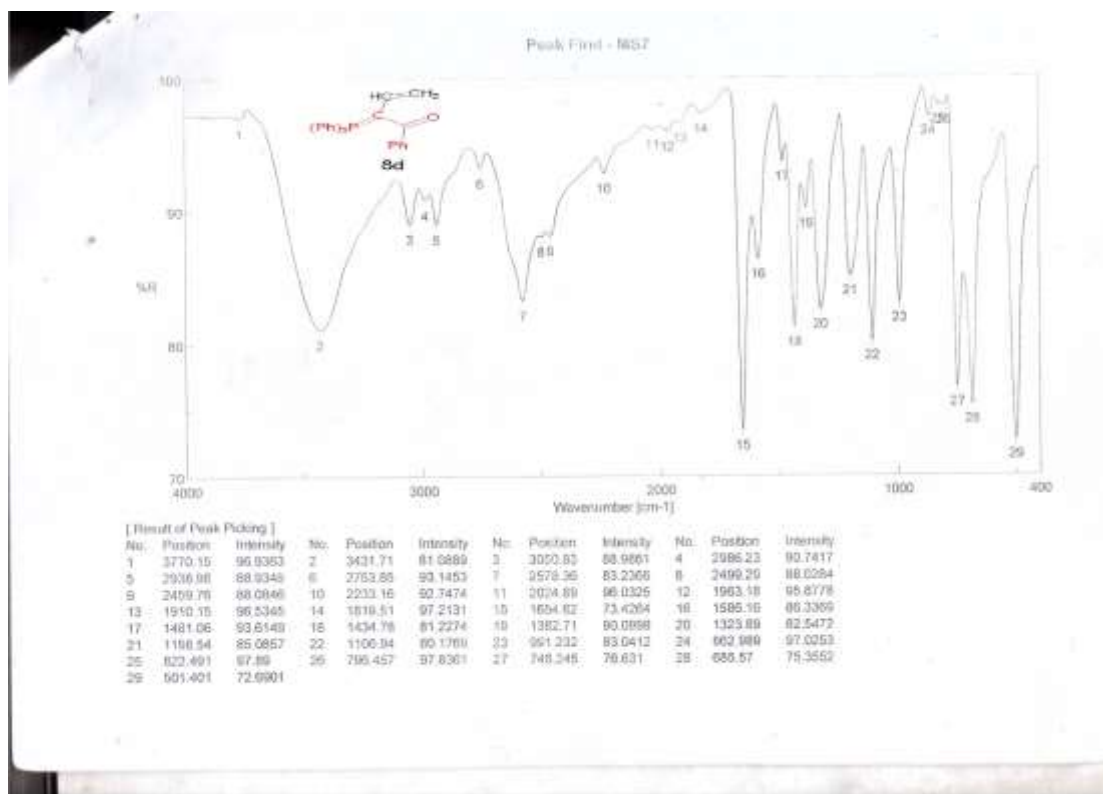

**MS, <sup>31</sup>P NMR, and IR compound 11a**

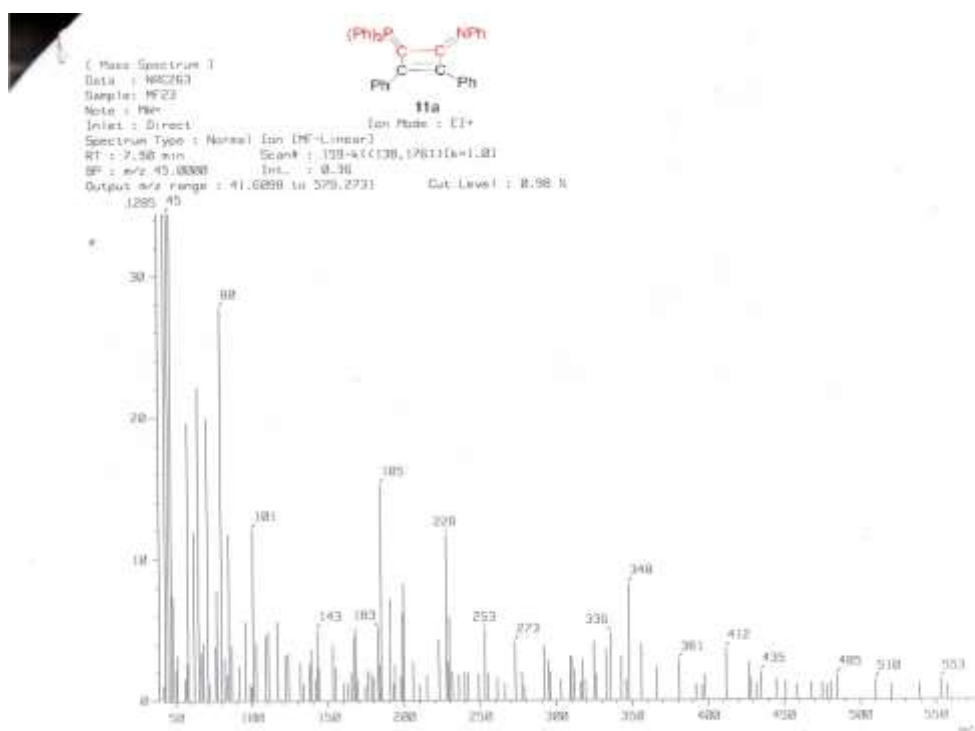

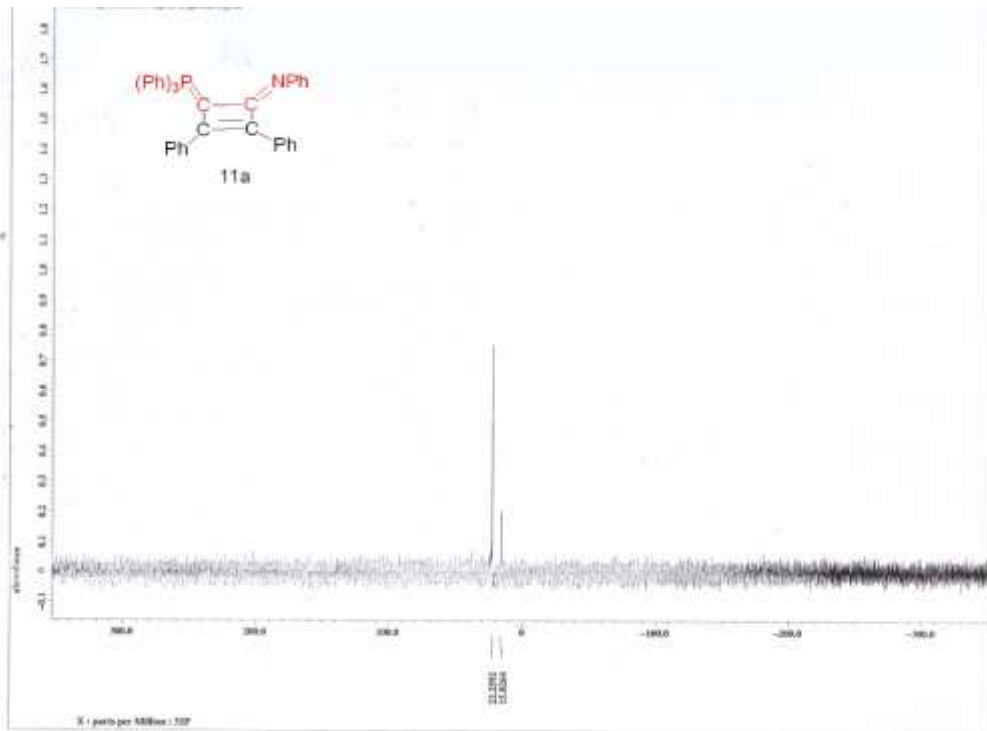

Peak Find - Memory-30

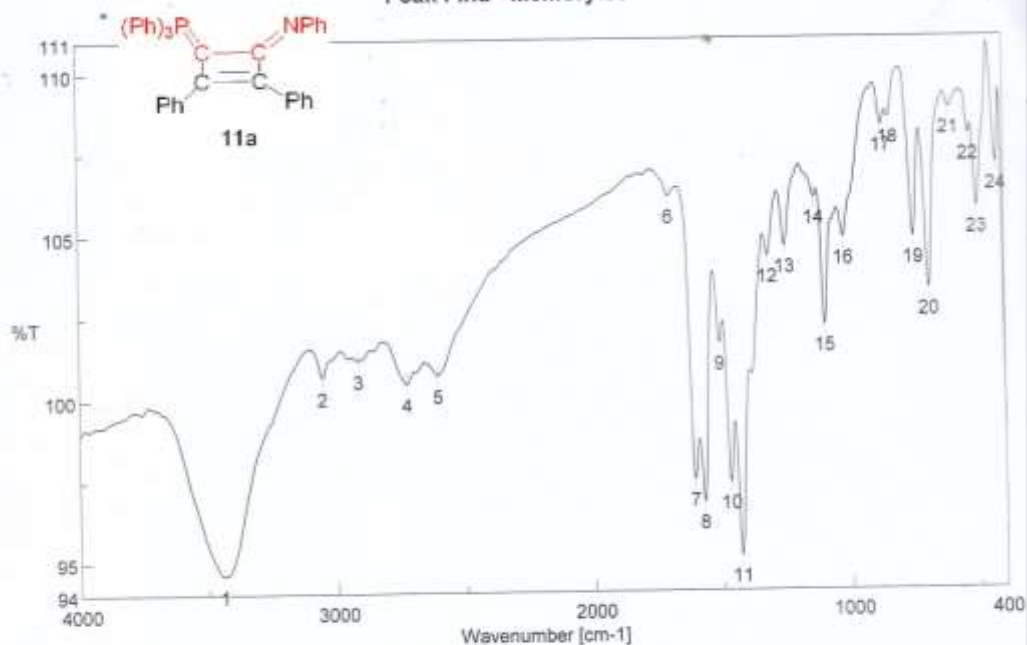

[Comments]  
 Sample name MF 23  
 Comment 10/2019  
 User IR  
 Division IR  
 Company MAC

[ Result of Peak Picking ]

| No. | Position | Intensity | No. | Position | Intensity |
|-----|----------|-----------|-----|----------|-----------|
| 1   | 3439.42  | 94.5902   | 3   | 2915.84  | 101.162   |
| 4   | 2726.85  | 100.45    | 6   | 1705.73  | 106.12    |
| 7   | 1609.31  | 97.4286   | 9   | 1511.92  | 101.615   |
| 10  | 1472.38  | 97.3367   | 12  | 1323.89  | 104.27    |
| 13  | 1257.36  | 104.565   | 15  | 1102.12  | 102.15    |
| 16  | 1027.87  | 104.812   | 18  | 848.525  | 108.493   |
| 19  | 754.031  | 104.816   | 21  | 611.324  | 106.779   |
| 22  | 536.114  | 107.958   | 24  | 429.084  | 107.046   |

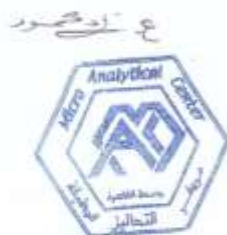



**<sup>31</sup>PNMR, <sup>1</sup>HNMR, IR, MS compound 11b**

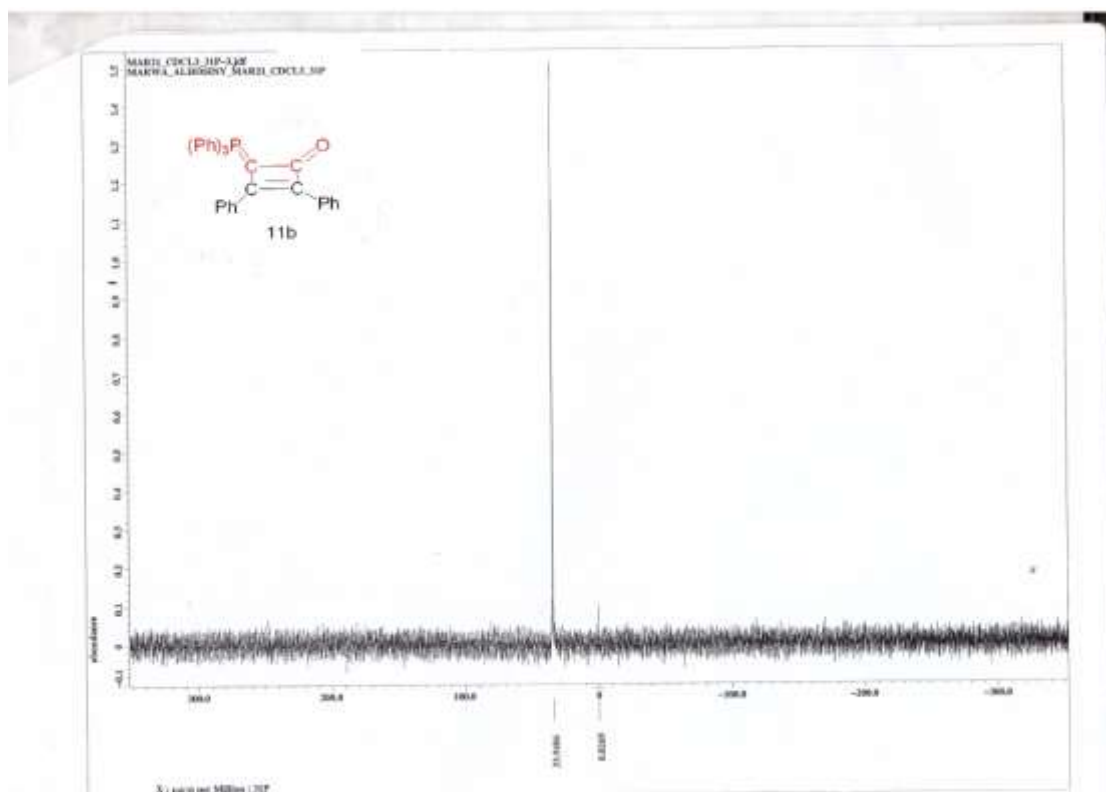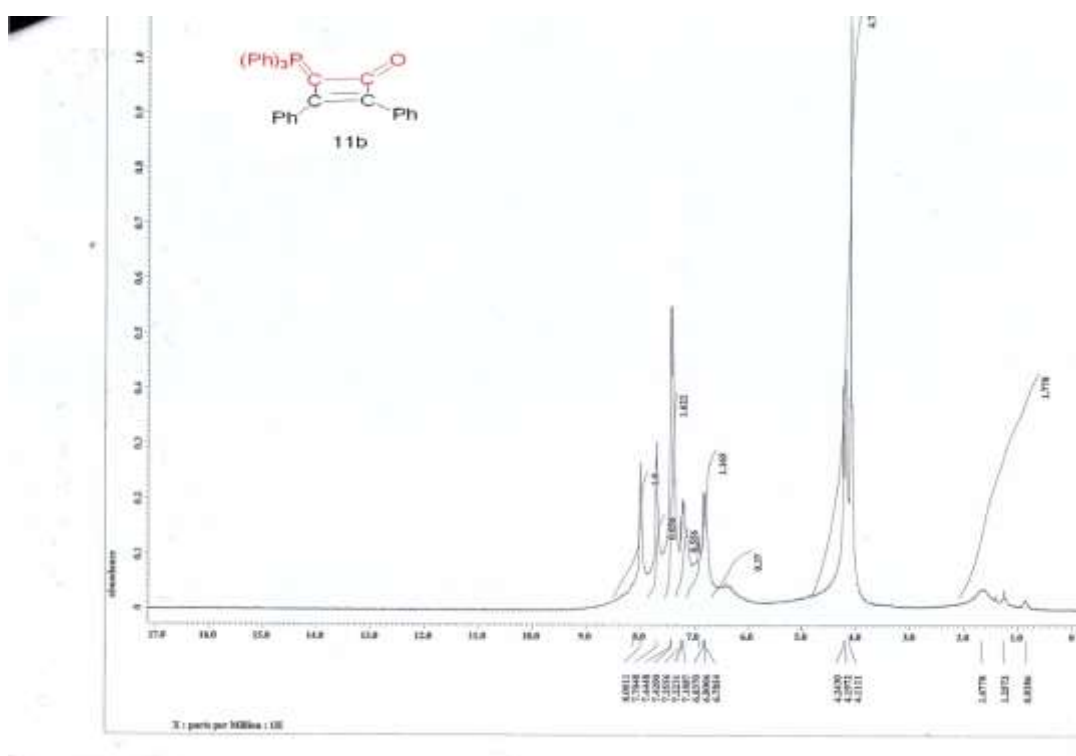

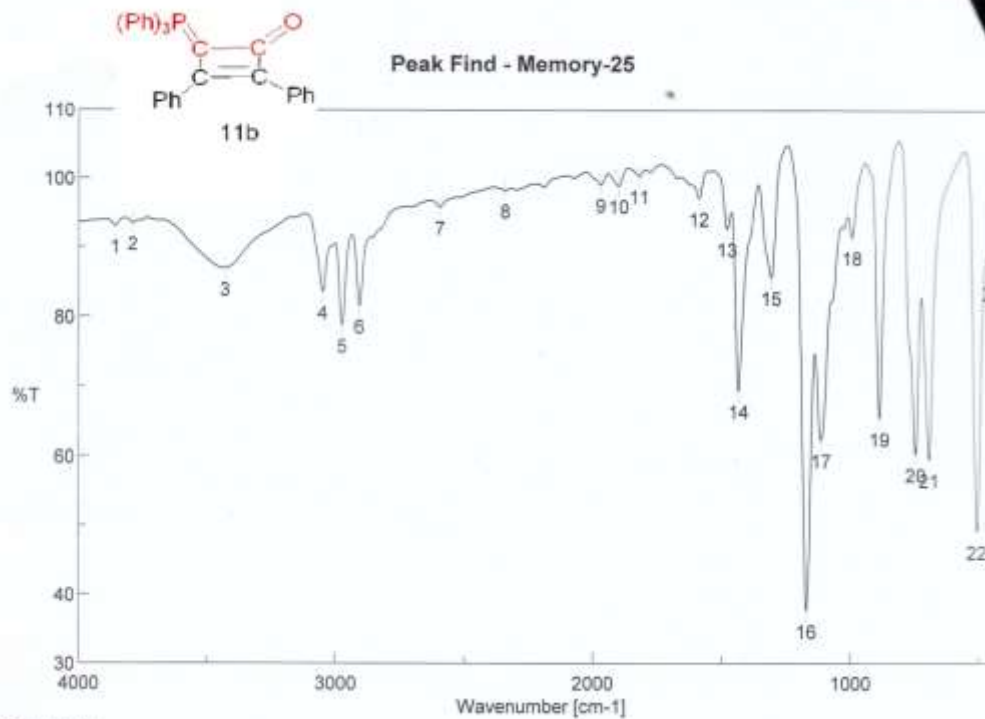

[Comments]  
 Sample name MF 21  
 Comment 10/2019  
 User IR  
 Division IR  
 Company MAC

[ Result of Peak Picking ]

| No. | Position | Intensity | No. | Position | Intensity | No. | Position | Intensity |
|-----|----------|-----------|-----|----------|-----------|-----|----------|-----------|
| 1   | 3856.93  | 93.0963   | 2   | 3787.51  | 93.4636   | 3   | 3429.78  | 86.9325   |
| 4   | 3051.8   | 83.5958   | 5   | 2977.55  | 78.7948   | 6   | 2910.06  | 81.6099   |
| 7   | 2596.68  | 95.7891   | 8   | 2342.12  | 98.2094   | 9   | 1969.93  | 99.064    |
| 10  | 1901.47  | 98.9149   | 11  | 1820.47  | 100.367   | 12  | 1590.02  | 97.0905   |
| 13  | 1482.03  | 92.706    | 14  | 1436.71  | 69.3914   | 15  | 1309.43  | 85.6952   |
| 16  | 1173.47  | 37.6221   | 17  | 1116.58  | 62.3573   | 18  | 996.053  | 91.4988   |
| 19  | 888.059  | 65.4595   | 20  | 747.281  | 60.325    | 21  | 694.248  | 59.5265   |
| 22  | 507.187  | 49.0883   | 23  | 445.476  | 86.3573   |     |          |           |

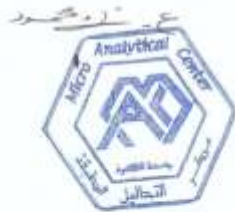

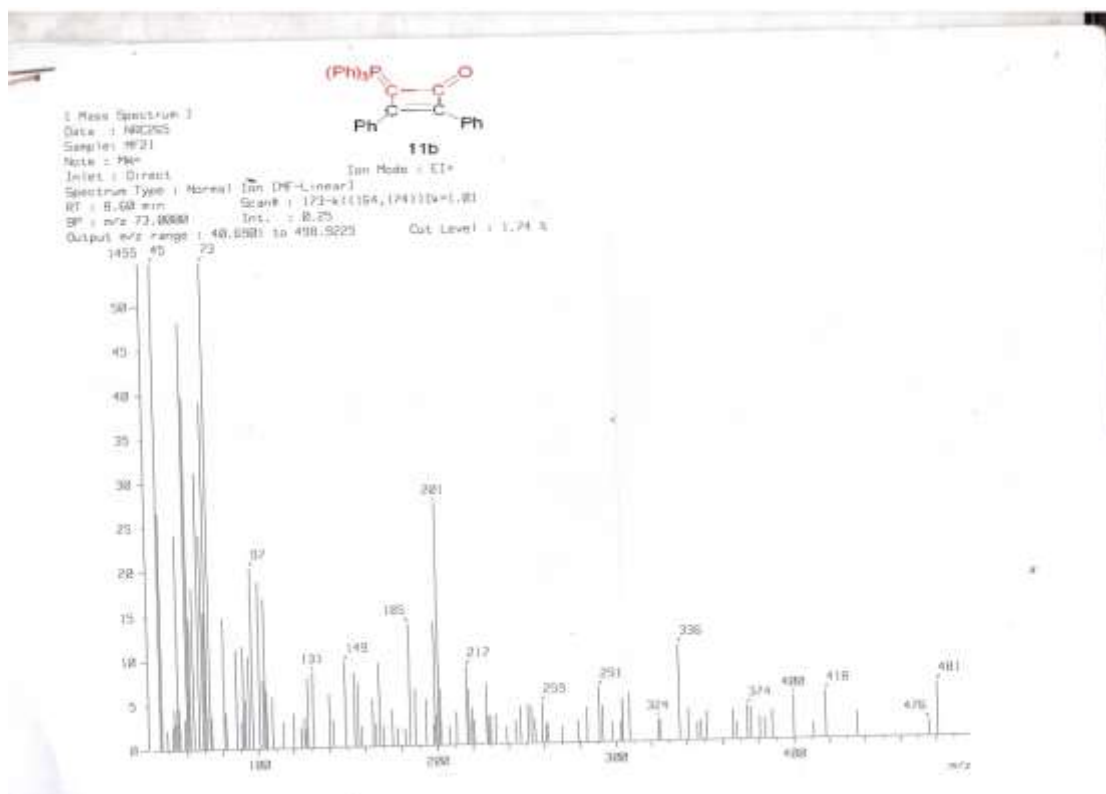

**<sup>1</sup>HNMR, IR, MS compound 13a**

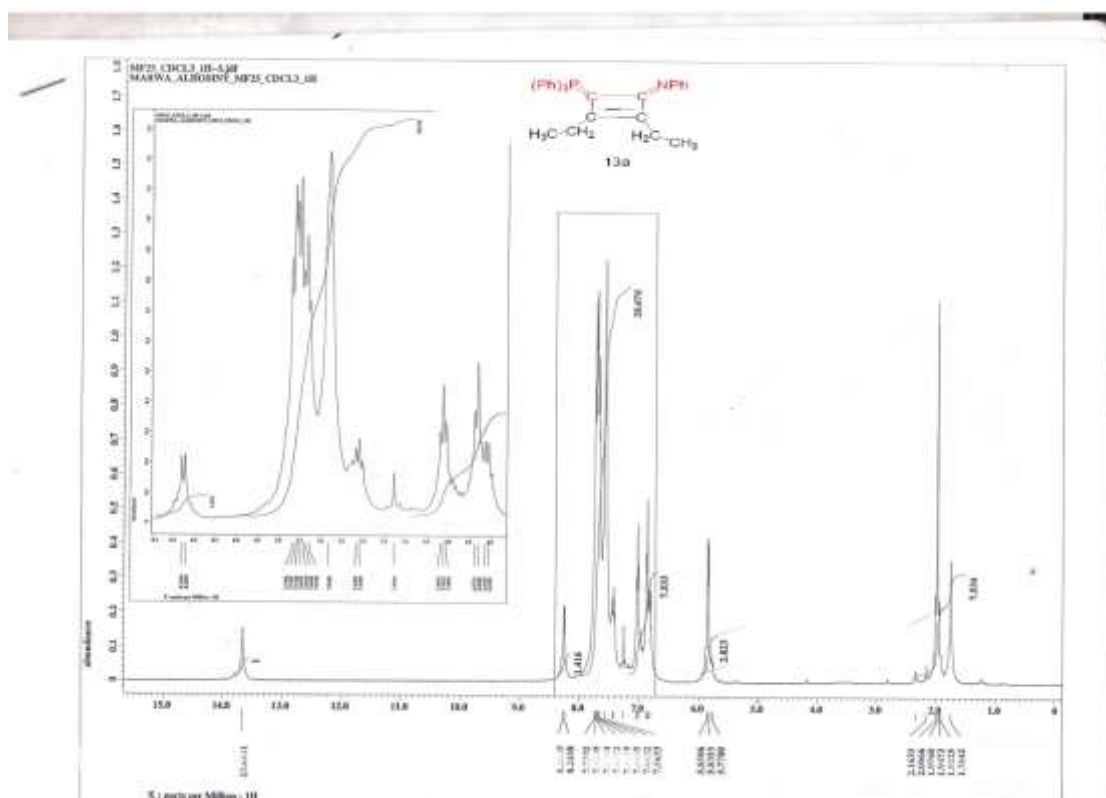

Peak Find - Memory-60

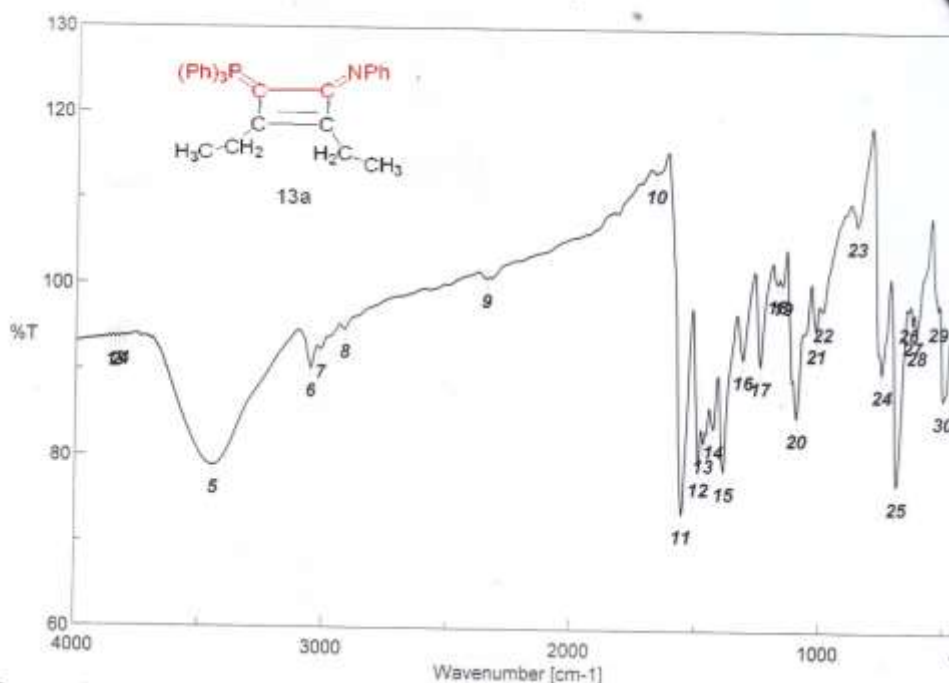

[Comments]  
 Sample name MF25  
 Comment 13/11/2013  
 User IR  
 Division IR  
 Company Micro Analytical Center

[ Result of Peak Picking ]

| No. | Position | Intensity | No. | Position | Intensity | No. | Position | Intensity |
|-----|----------|-----------|-----|----------|-----------|-----|----------|-----------|
| 1   | 3858.86  | 93.5882   | 2   | 3840.54  | 93.5541   | 3   | 3824.15  | 93.6599   |
| 4   | 3806.79  | 93.7308   | 5   | 3443.28  | 78.8591   | 6   | 3054.69  | 90.2689   |
| 7   | 3016.12  | 92.4751   | 8   | 2918.73  | 94.8319   | 9   | 2348.87  | 100.858   |
| 10  | 1671.02  | 113.302   | 11  | 1555.31  | 73.659    | 12  | 1490.7   | 79.1841   |
| 13  | 1471.42  | 81.9433   | 14  | 1430.92  | 83.6306   | 15  | 1399.46  | 78.6746   |
| 16  | 1314.25  | 91.7219   | 17  | 1244.83  | 91.0199   | 18  | 1178.29  | 100.631   |
| 19  | 1159.97  | 100.483   | 20  | 1098.26  | 84.9915   | 21  | 1020.16  | 94.8983   |
| 22  | 995.089  | 97.4497   | 23  | 860.096  | 107.452   | 24  | 754.031  | 90.2023   |
| 25  | 691.355  | 77.1458   | 26  | 647.965  | 97.5221   | 27  | 630.609  | 95.9965   |
| 28  | 614.217  | 94.8493   | 29  | 528.4    | 97.6579   | 30  | 505.258  | 87.1903   |
| 31  | 408.835  | 92.7586   |     |          |           |     |          |           |

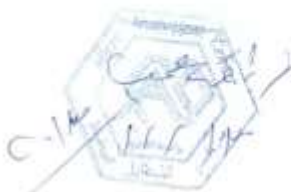

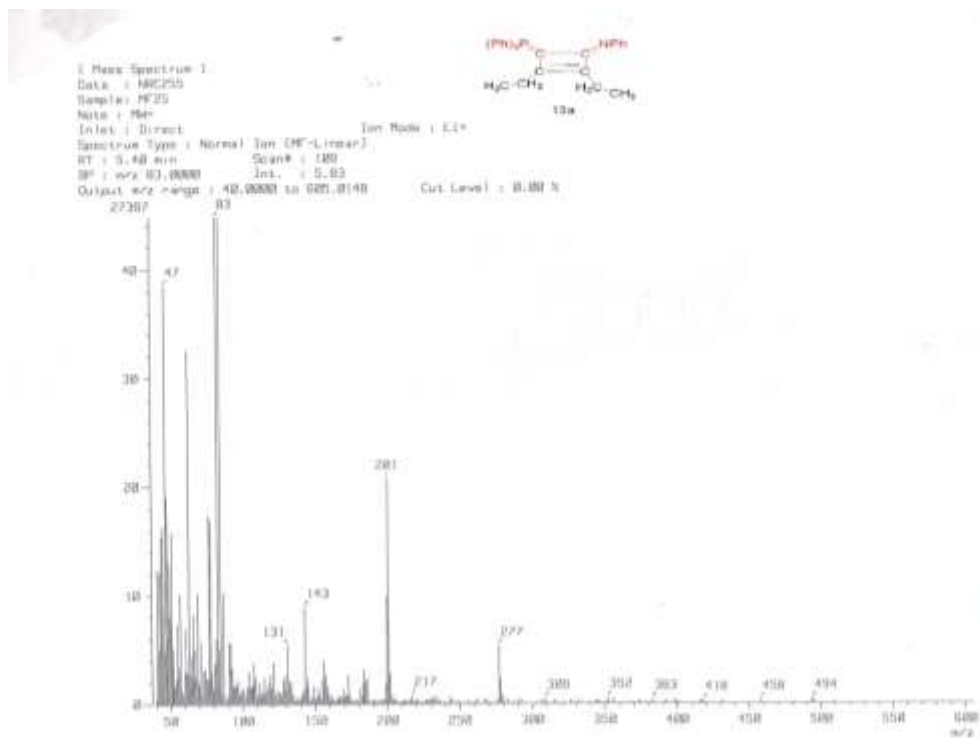

***<sup>31</sup>PNMR, <sup>1</sup>HNMR, MS compound 13b***

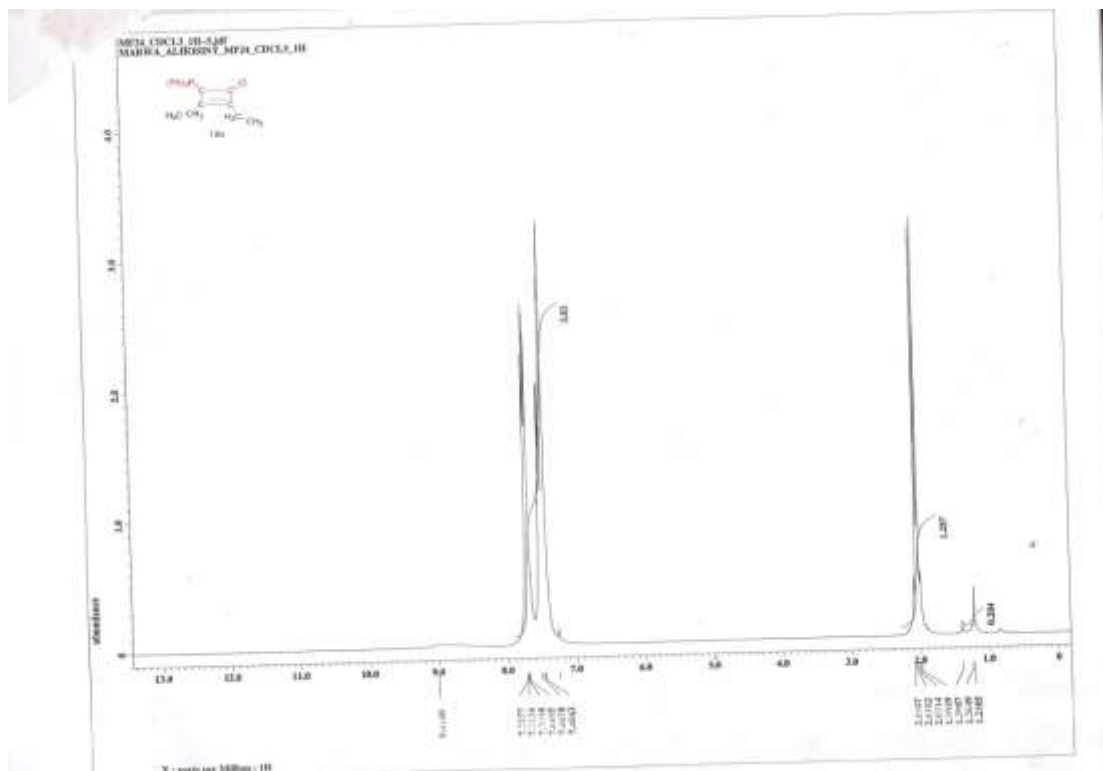

11

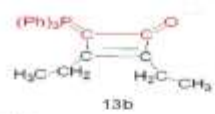

Mass Spectrum  
Data : NRC256  
Sample: MF24  
Note : Me+  
Inlet : Direct Ion Mode : EI+  
Spectrum Type : Normal Ion (PF-Linear)  
RT : 3.78 min Scan# : 25-41(72,76)(k+1.0)  
SP : v/v 70.0000 Int. : 8.27  
Output v/z range : 40.0000 to 400.2500 Cut Level : 3.30 %

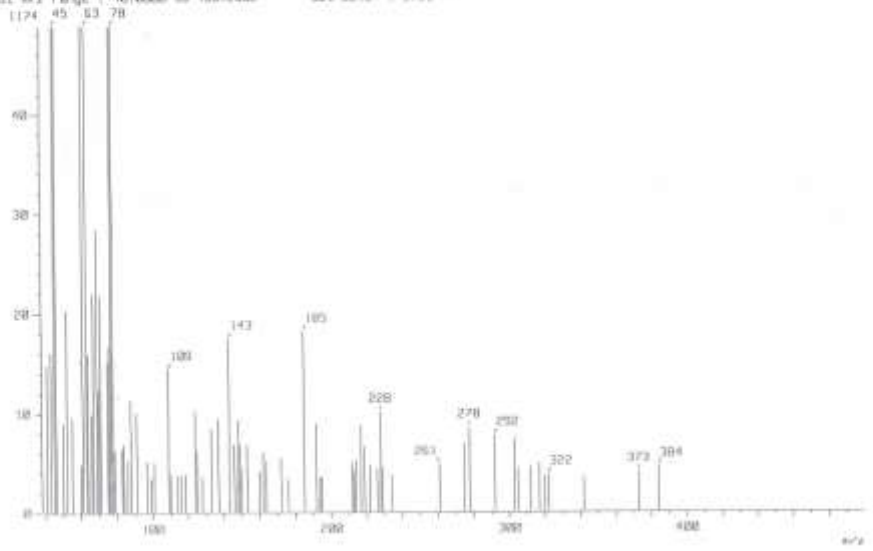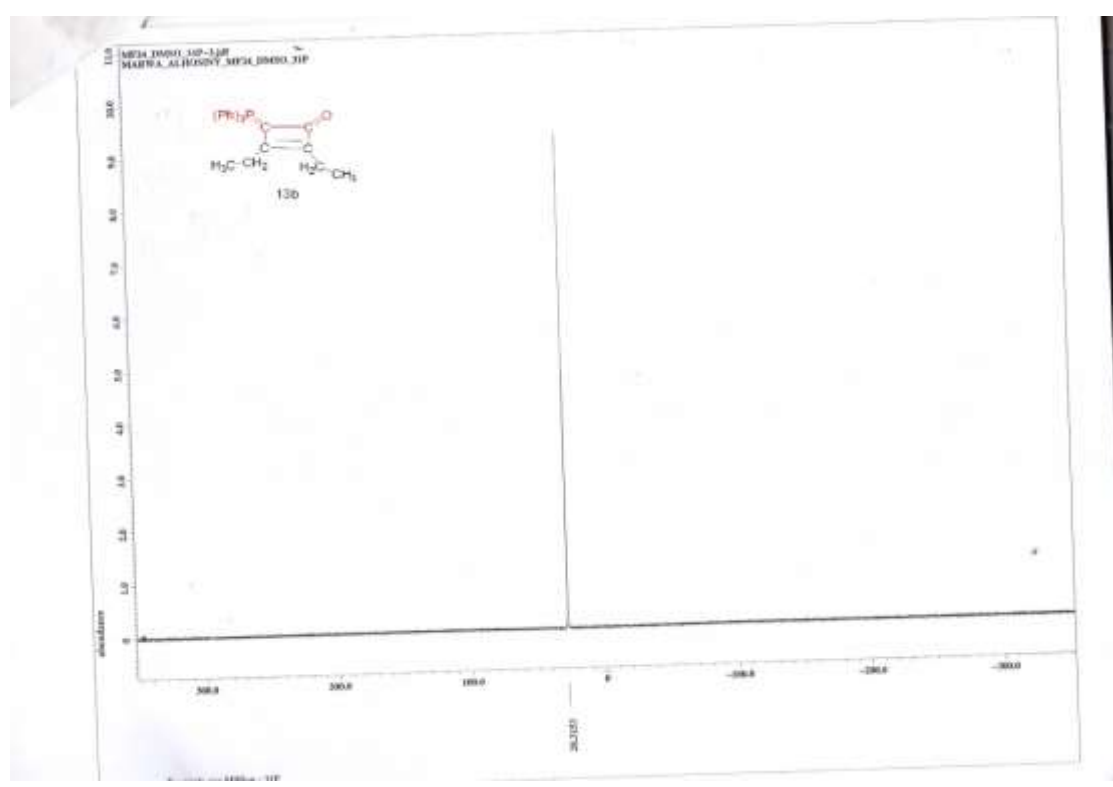

**<sup>31</sup>PNMR, <sup>1</sup>HNMR, IR compound 15**

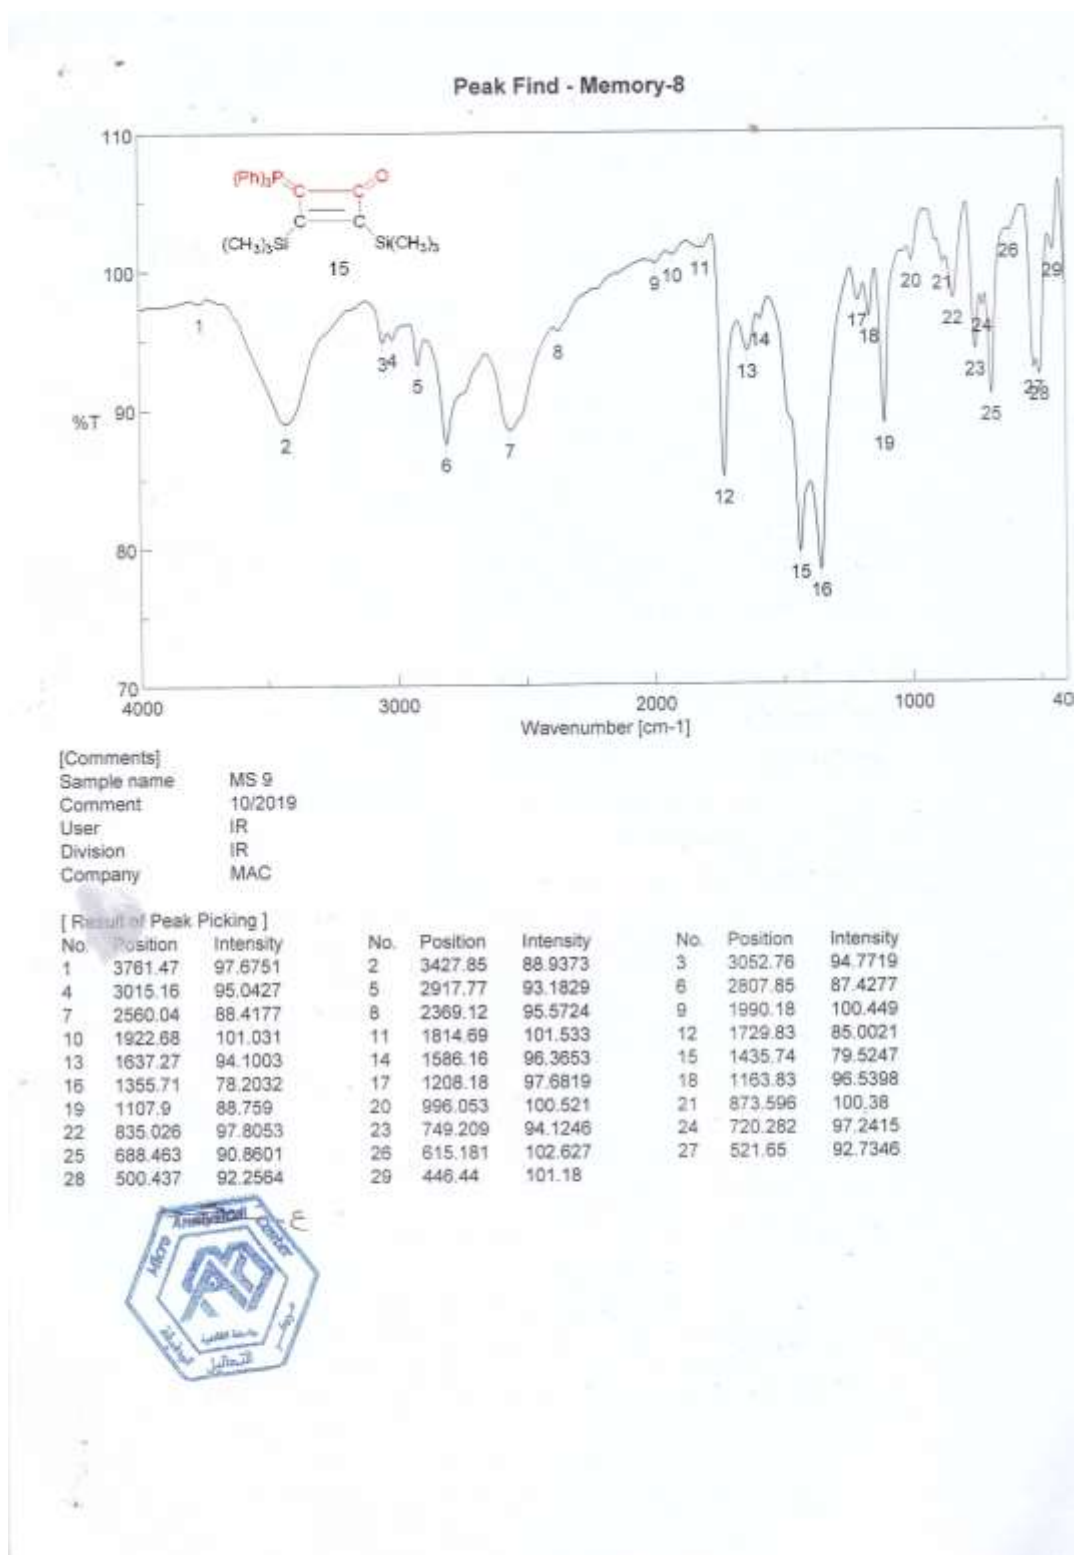

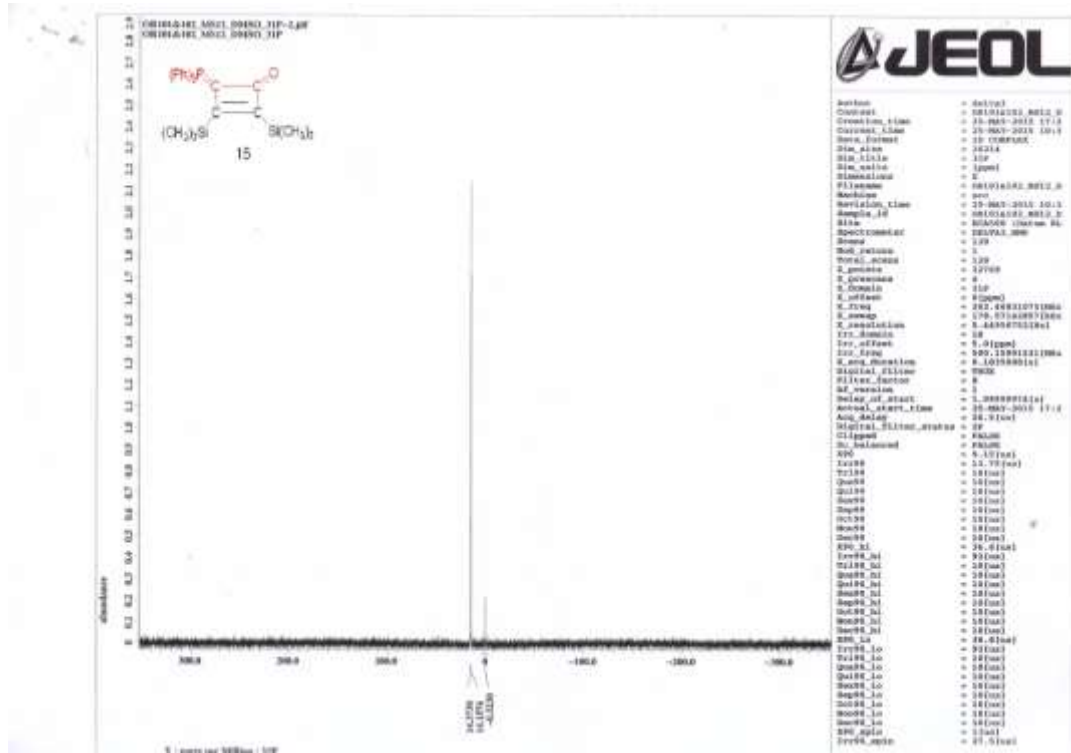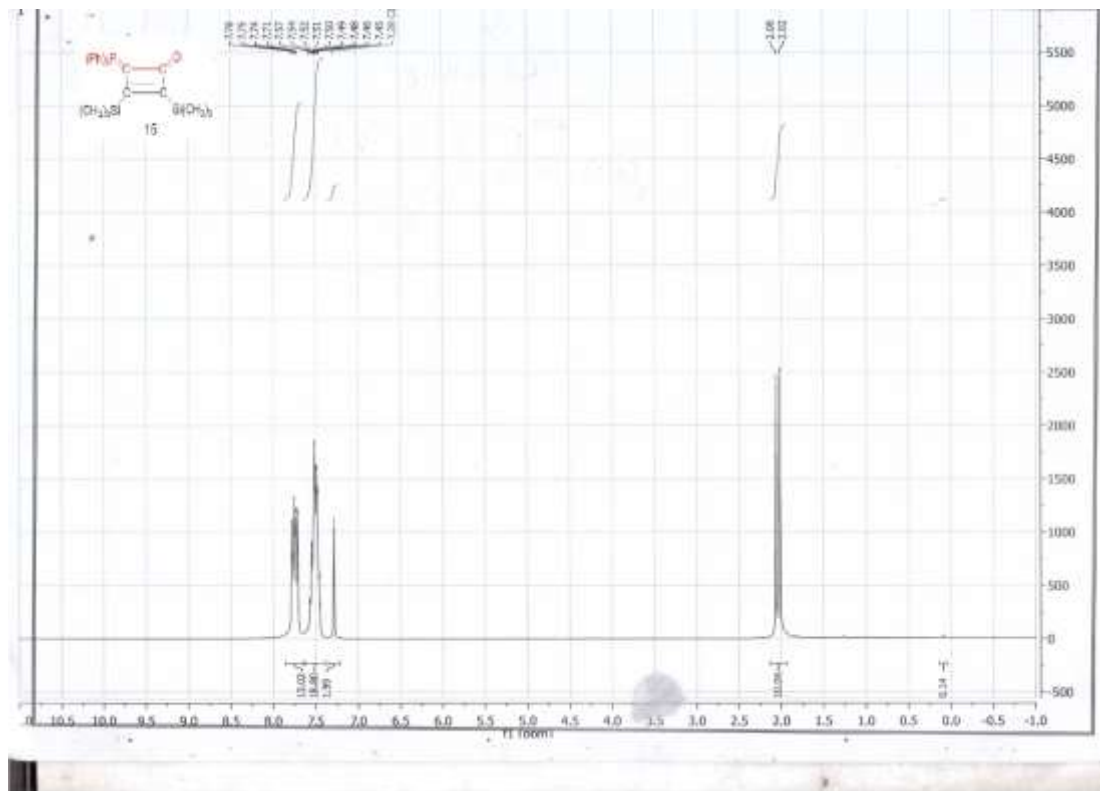



S2. Graphs for  $IC_{50}$  calculation of AChE inhibition

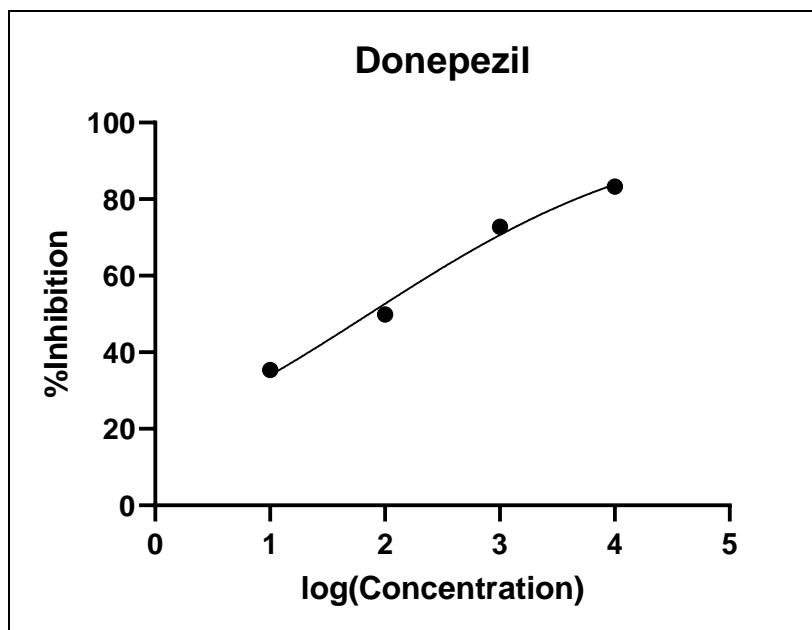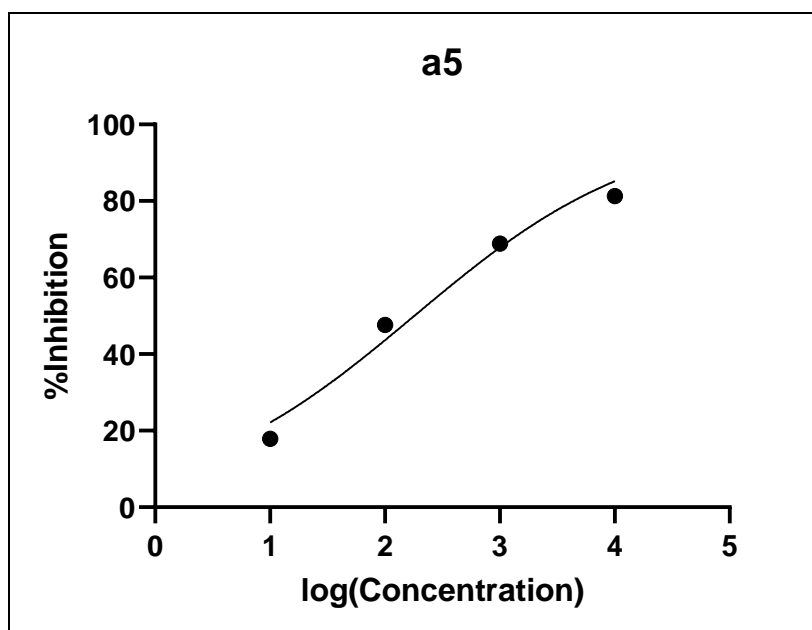

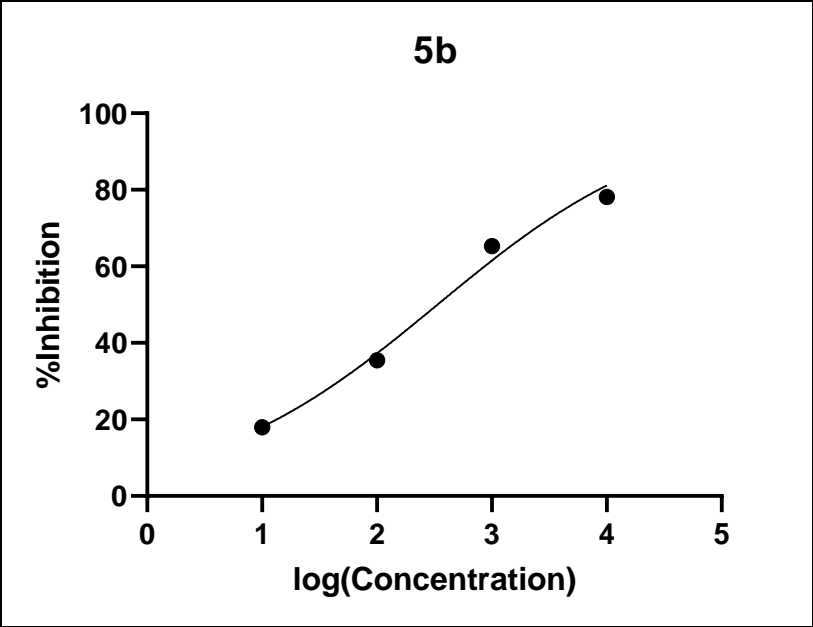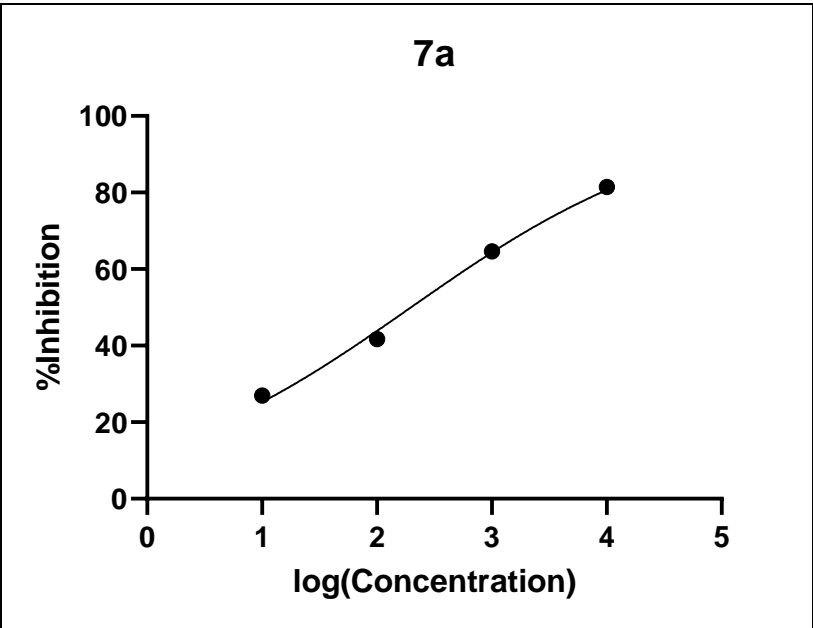

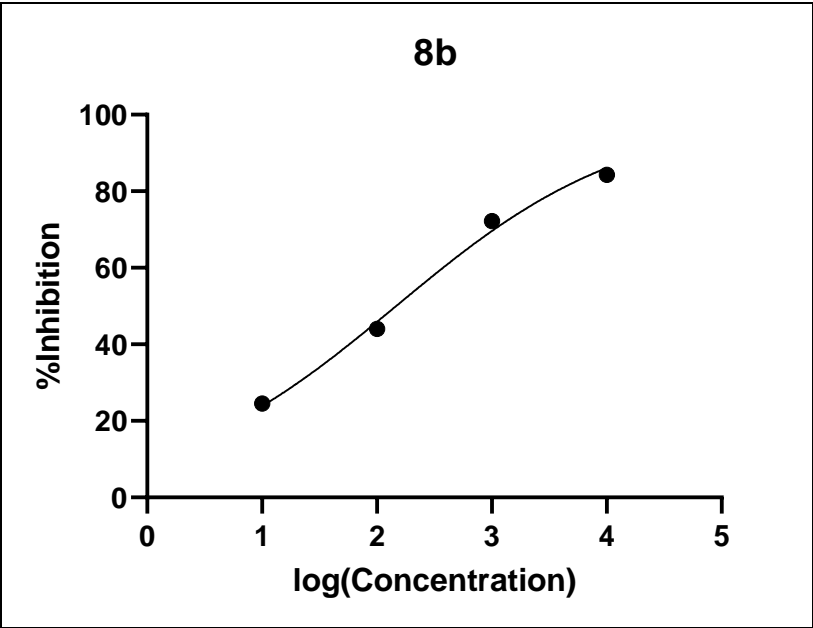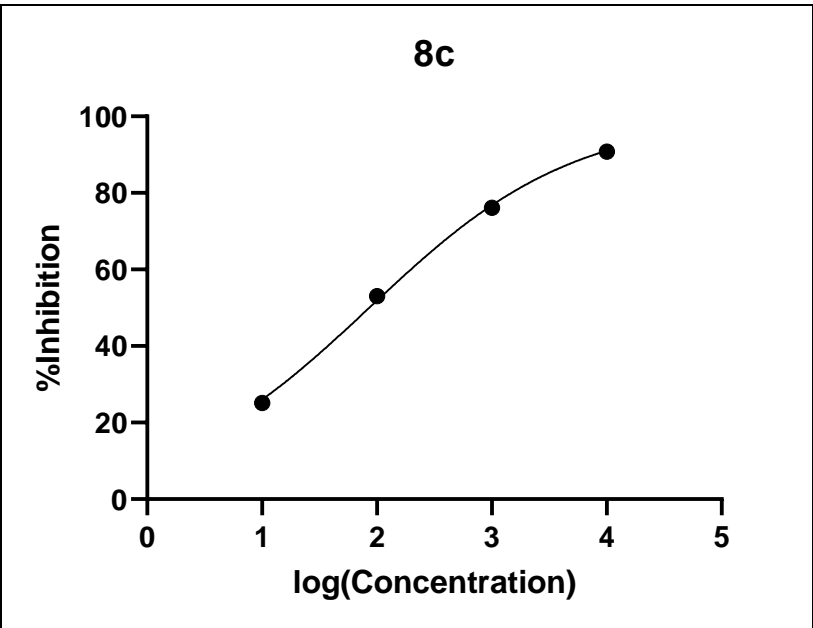

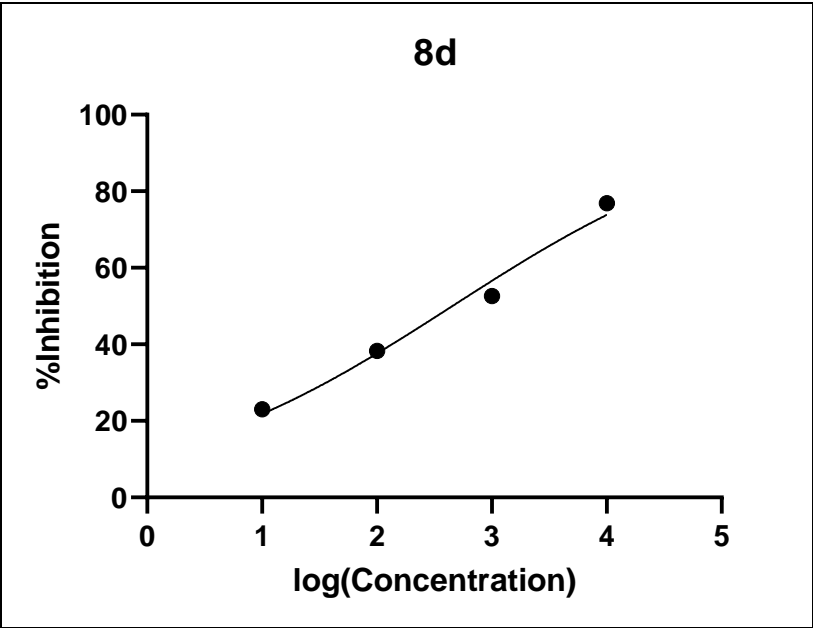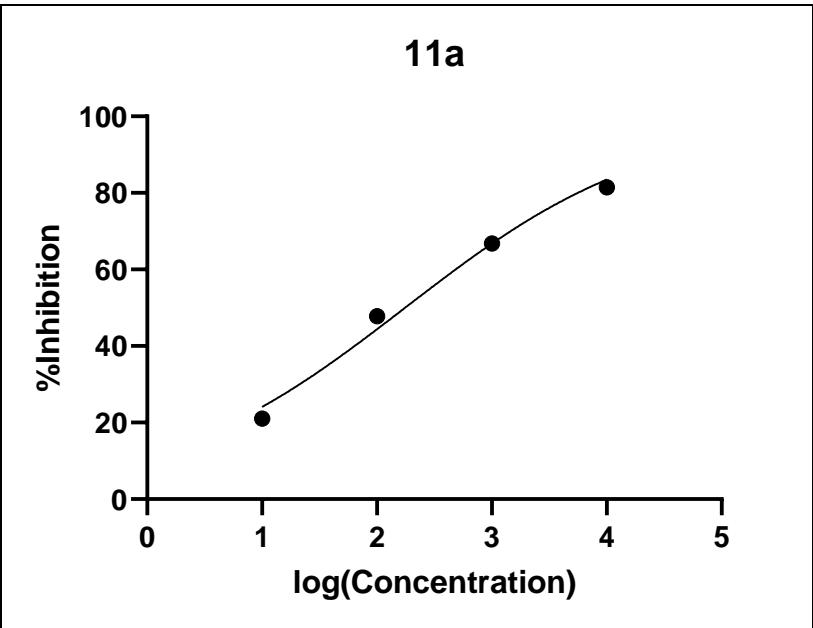

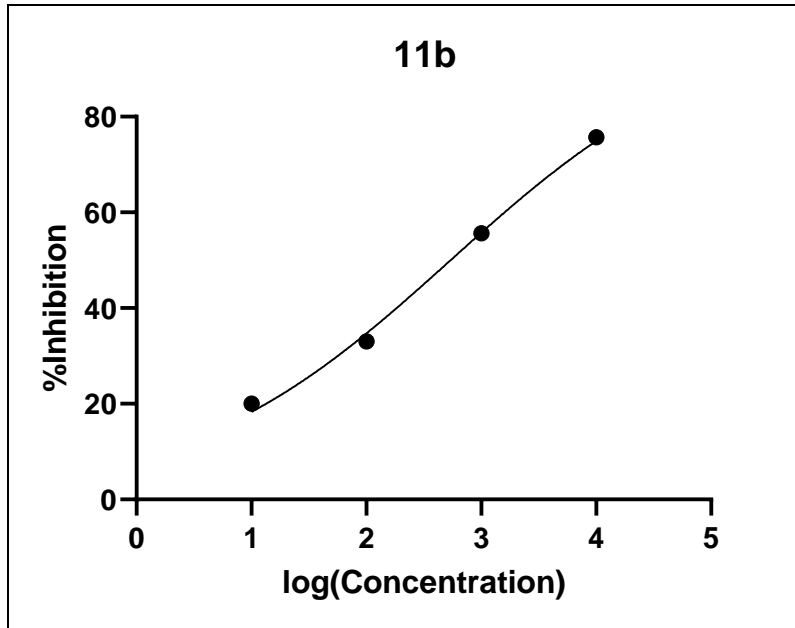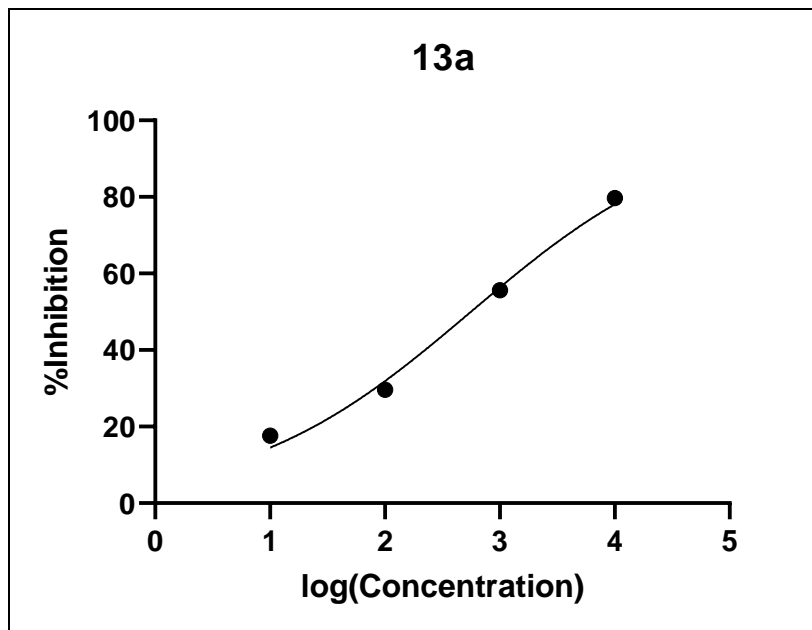

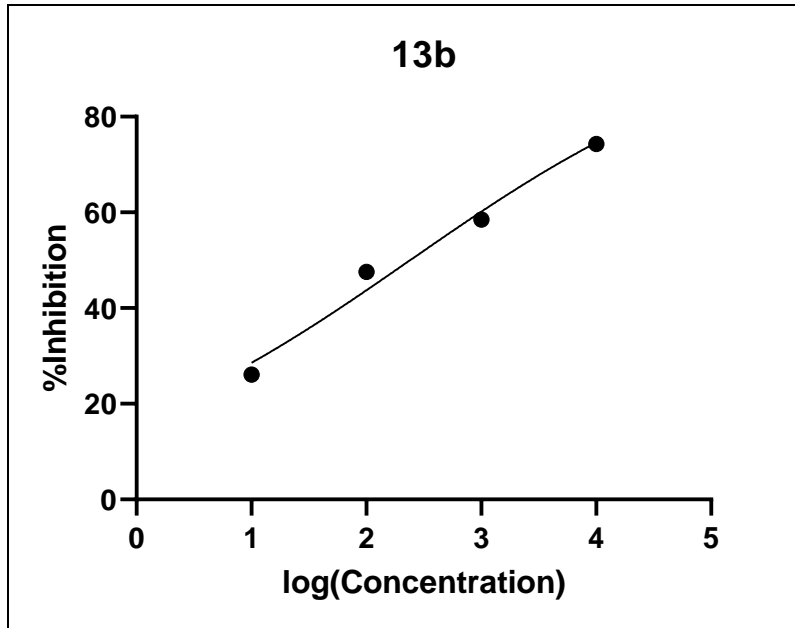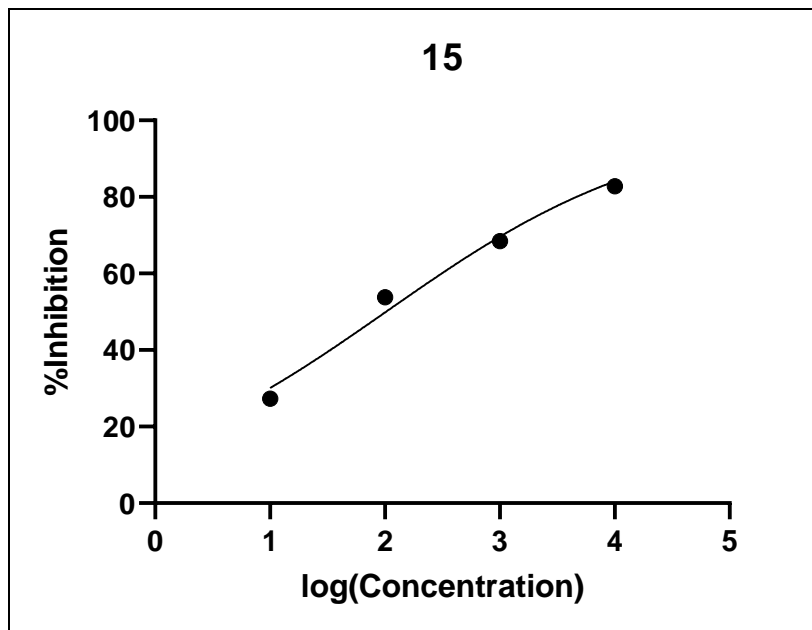

Supplement: IENZ_A_2166040_SM8114.pdf [file IENZ_A_2166040_SM8114.pdf]
